# Supplementary material for: Trinorlabdane diterpenoid alkaloids featuring an unprecedented skeleton with anti-inflammatory and anti-viral activities fromForsythia suspensa
Source: Royal Society of Chemistry journal article supplement (doi:10.1039/d1ra05760j), 2021-01-01
Supplement: d1ra05760j1.pdf [file d1ra05760j1.pdf]

## Supporting Information

### **Trinorlabdane diterpenoid alkaloids featuring an unprecedented skeleton with anti-inflammatory and anti-viral activities from *Forsythia suspensa***

Wei Li,<sup>a</sup> Lin Zhao,<sup>a</sup> Li-Tong Sun,<sup>a</sup> Ze-Ping Xie,<sup>b</sup> Shu-Min Zhang,<sup>\*,b</sup> Xi-Dian Yue,<sup>\*,c</sup> and Sheng-Jun Dai<sup>\*,a</sup>

<sup>a</sup>*School of Pharmaceutical Science, Yantai University, Yantai 264005, P.R. China, E-mail:*

*daishengjun\_9@hotmail.com, shummin\_zhang@outlook.com, yuexidian@163.com*

<sup>b</sup>*School of Pharmaceutical Science, Binzhou Medical University, Yantai 264003, P.R. China*

<sup>c</sup>*College of Life Sciences, Yantai University, Yantai 264005, P.R. China*

---

\*Corresponding author.

*E-mail: daishengjun\_9@hotmail.com, shummin\_zhang@outlook.com, yuexidian@163.com*

## Contexts of Supporting Information

|                                                                                            |          |
|--------------------------------------------------------------------------------------------|----------|
| <b>The elucidation of chemical structure.....</b>                                          | <b>3</b> |
| Figure S1. HR-ESI spectrum of 1 .....                                                      | 3        |
| Figure S2. <sup>1</sup> H NMR spectrum of 1 in DMSO-d <sub>6</sub> .....                   | 5        |
| Figure S3. <sup>13</sup> C NMR spectrum of 1 in DMSO-d <sub>6</sub> .....                  | 7        |
| Figure S4. <sup>1</sup> H- <sup>1</sup> H COSY spectrum of 1 in DMSO-d <sub>6</sub> .....  | 8        |
| Figure S5. HMQC spectrum of 1 in DMSO-d <sub>6</sub> .....                                 | 9        |
| Figure S6. HMBC spectrum of 1 in DMSO-d <sub>6</sub> .....                                 | 11       |
| Figure S7. NOESY spectrum of 1 in DMSO-d <sub>6</sub> .....                                | 13       |
| Figure S8. X-ray crystallographic data of 1 .....                                          | 16       |
| Figure S9. HR-ESI spectrum of 2 .....                                                      | 16       |
| Figure S10. <sup>1</sup> H NMR spectrum of 2 in DMSO-d <sub>6</sub> .....                  | 18       |
| Figure S11. <sup>13</sup> C NMR spectrum of 2 in DMSO-d <sub>6</sub> .....                 | 20       |
| Figure S12. HMQC spectrum of 2 in DMSO-d <sub>6</sub> .....                                | 21       |
| Figure S13. HMBC spectrum of 2 in DMSO-d <sub>6</sub> .....                                | 22       |
| Figure S14. <sup>1</sup> H- <sup>1</sup> H COSY spectrum of 2 in DMSO-d <sub>6</sub> ..... | 23       |
| Figure S15. NOESY spectrum of 2 in DMSO-d <sub>6</sub> .....                               | 24       |
| Figure S16. UV spectrum of 2 in MeOH .....                                                 | 25       |
| Figure S17. ECD data of 2 .....                                                            | 29       |

# The elucidation of chemical structure

SBA3-4-1 #11 RT: 0.05 AV: 1 NL: 5.72E9  
T: FTMS + p ESIFull.ms [100.0000-1500.0000]

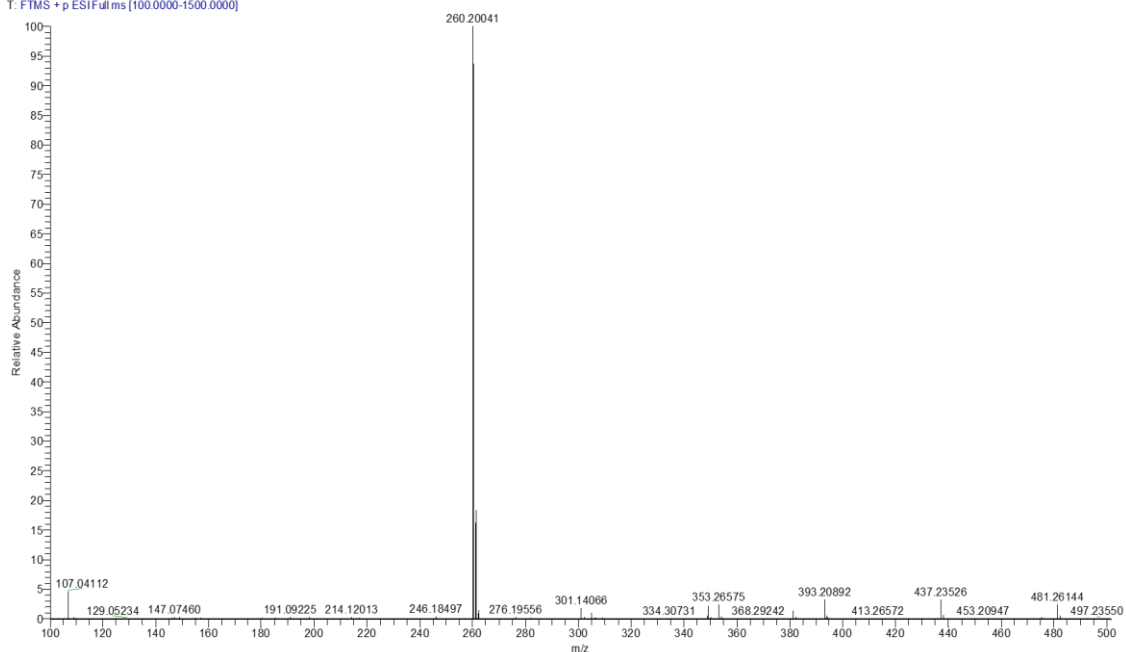

Figure S1. HR-ESI spectrum of 1

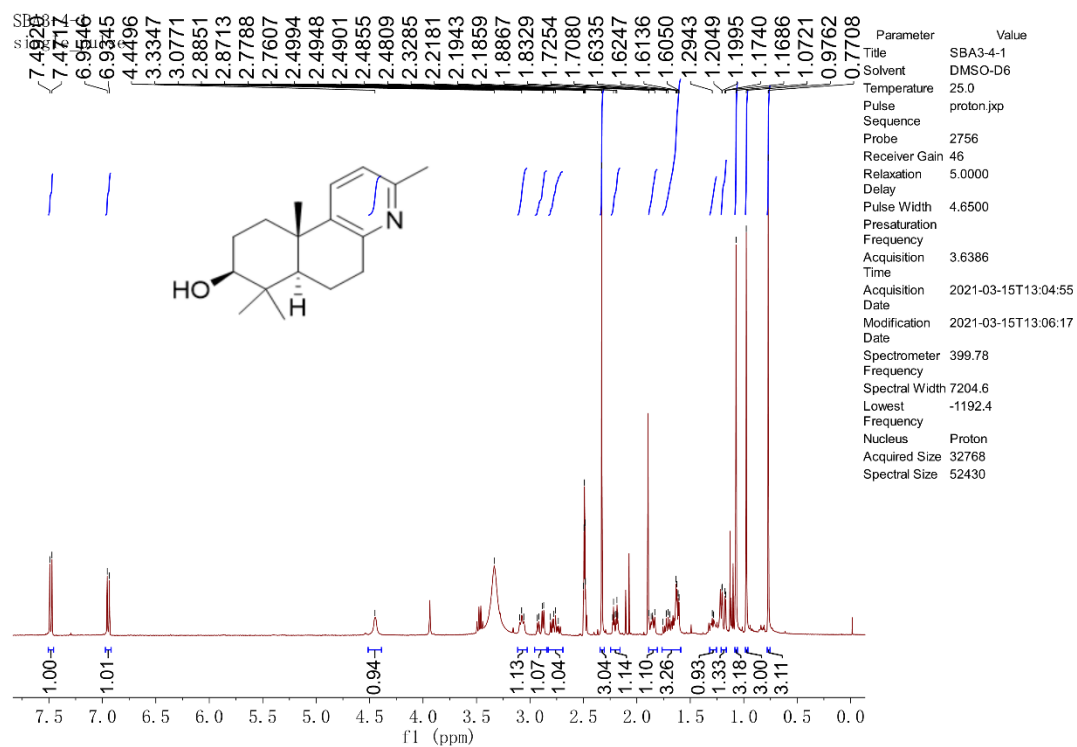

SBA3-4-1  
single\_pulse  
-7.4920  
-7.4717

-6.9546  
-6.9345

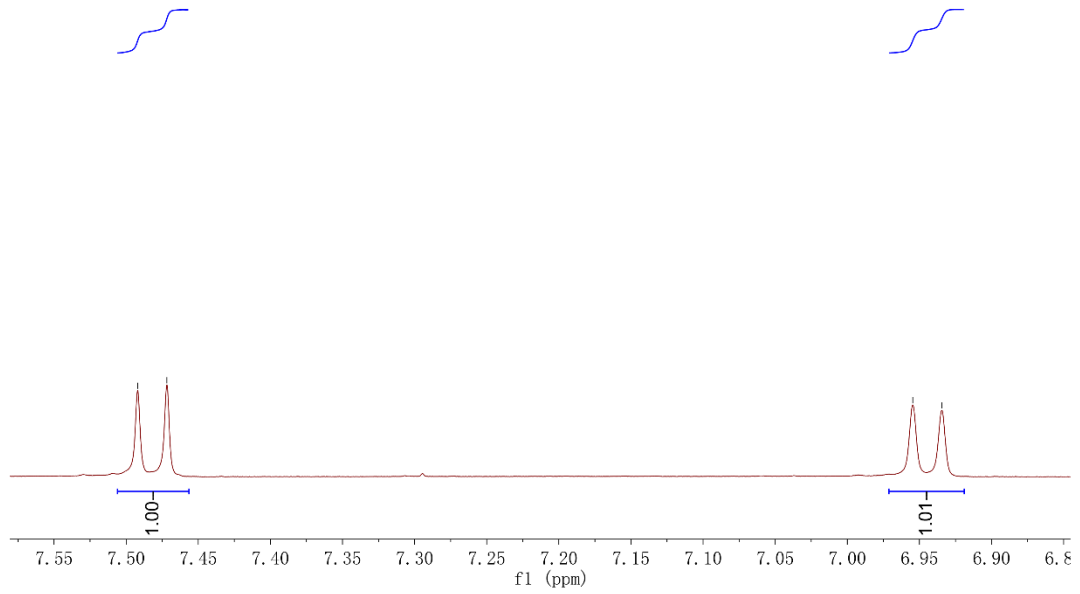

SBA3-4-1  
single\_pulse  
-4.4196

-3.3347

3.0951  
3.0771  
3.0582  
2.9305  
2.9165  
2.8851  
2.8713  
2.8077  
2.7788  
2.7607  
2.7336

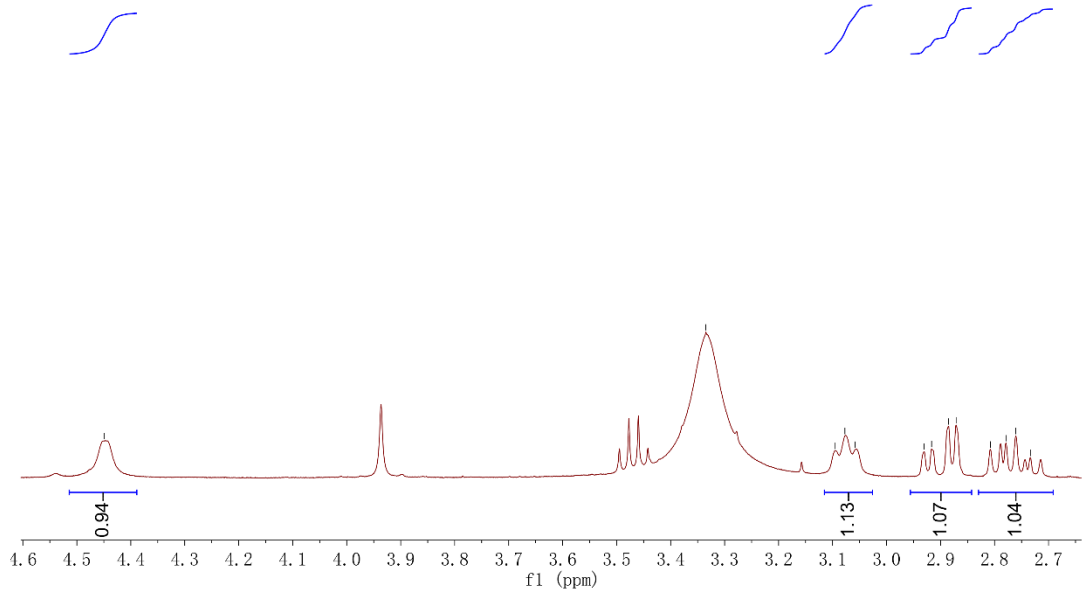

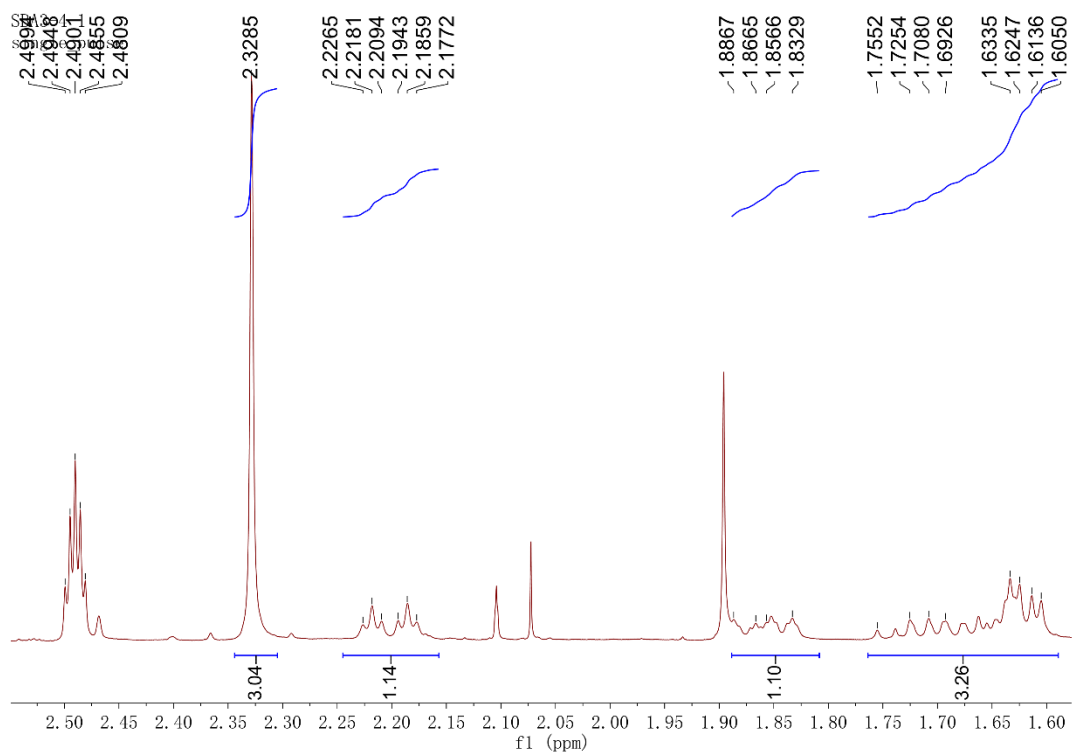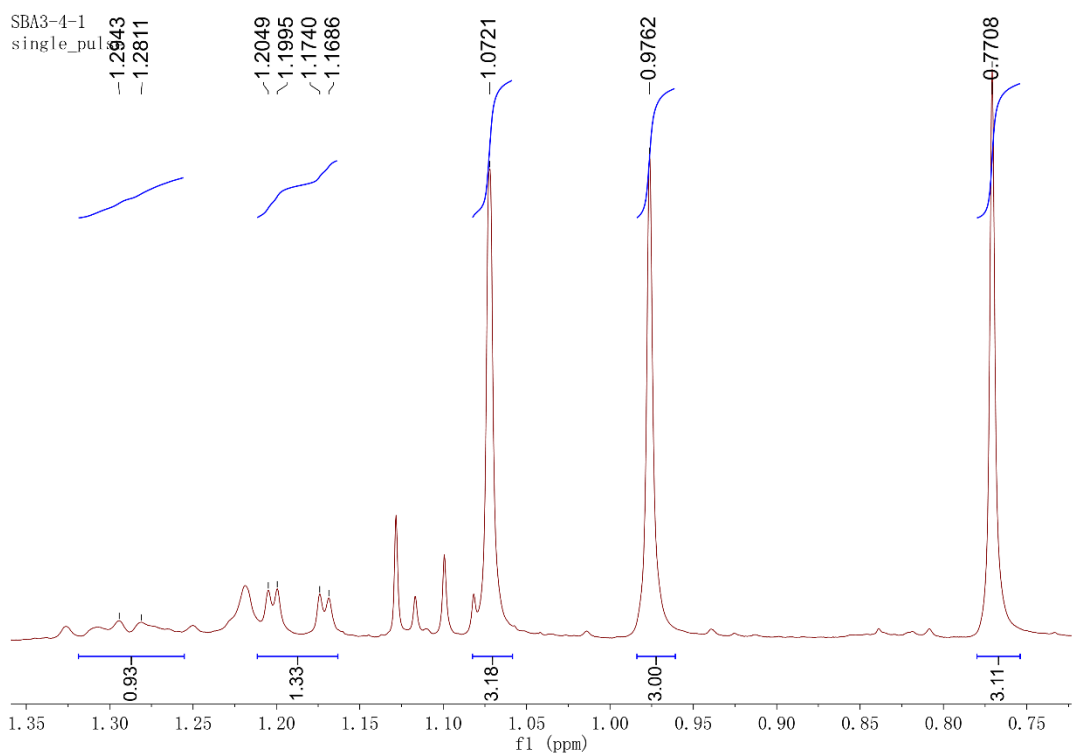

Figure S2.  $^1\text{H}$  NMR spectrum of 1 in  $\text{DMSO-d}_6$

SBA3-4-1  
single pulse decoupled gated NOE

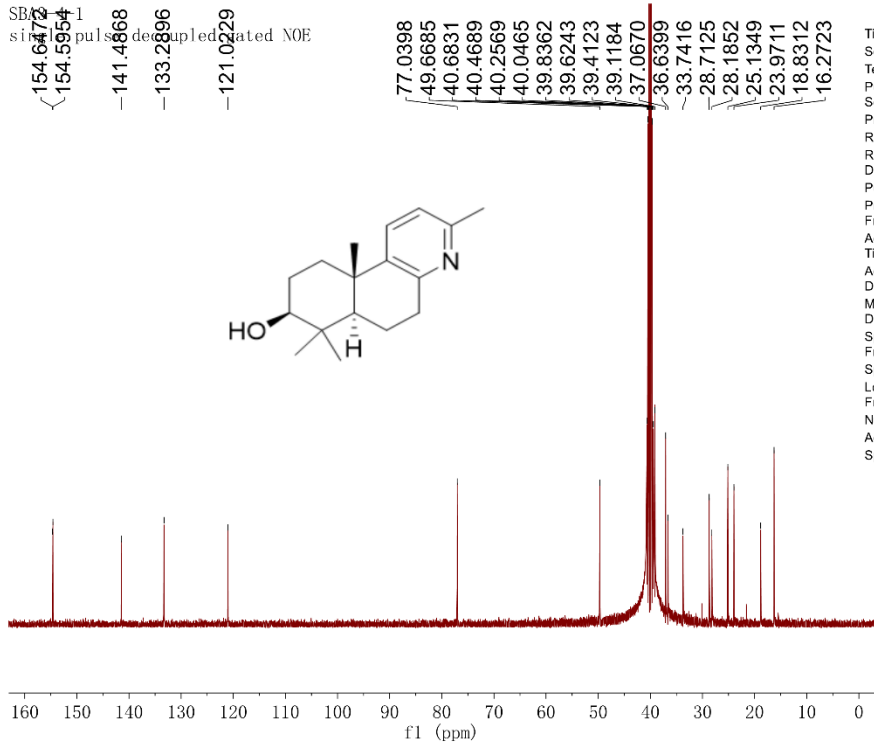

| Parameter               | Value               |
|-------------------------|---------------------|
| Title                   | SBA3-4-1            |
| Solvent                 | DMSO-D6             |
| Temperature             | 25.0                |
| Pulse Sequence          | carbon.jxp          |
| Probe                   | 2756                |
| Receiver Gain           | 50                  |
| Relaxation Delay        | 2.0000              |
| Pulse Width             | 3.1500              |
| Presaturation Frequency |                     |
| Acquisition Time        | 1.0381              |
| Acquisition Date        | 2021-03-16T22:10:03 |
| Modification Date       | 2021-03-16T23:02:10 |
| Spectrometer Frequency  | 100.53              |
| Spectral Width          | 25252.5             |
| Lowest Frequency        | -2573.7             |
| Nucleus                 | Carbon13            |
| Acquired Size           | 32768               |
| Spectral Size           | 52430               |

SBA3-4-1  
single pulse decoupled gated NOE

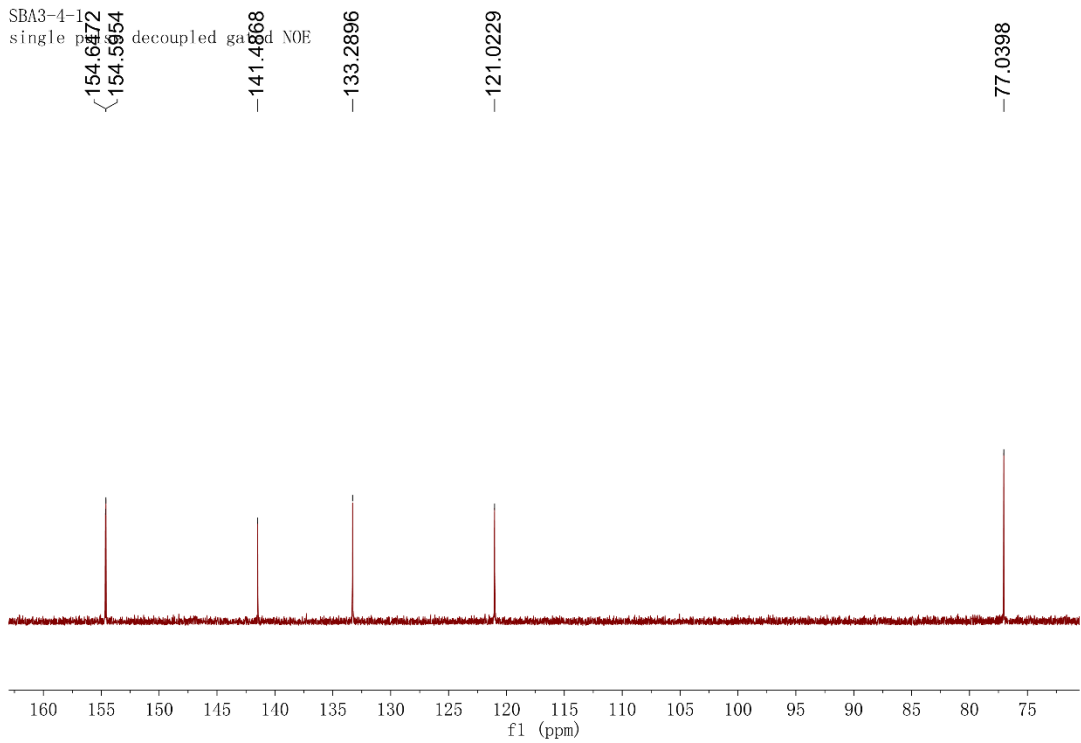

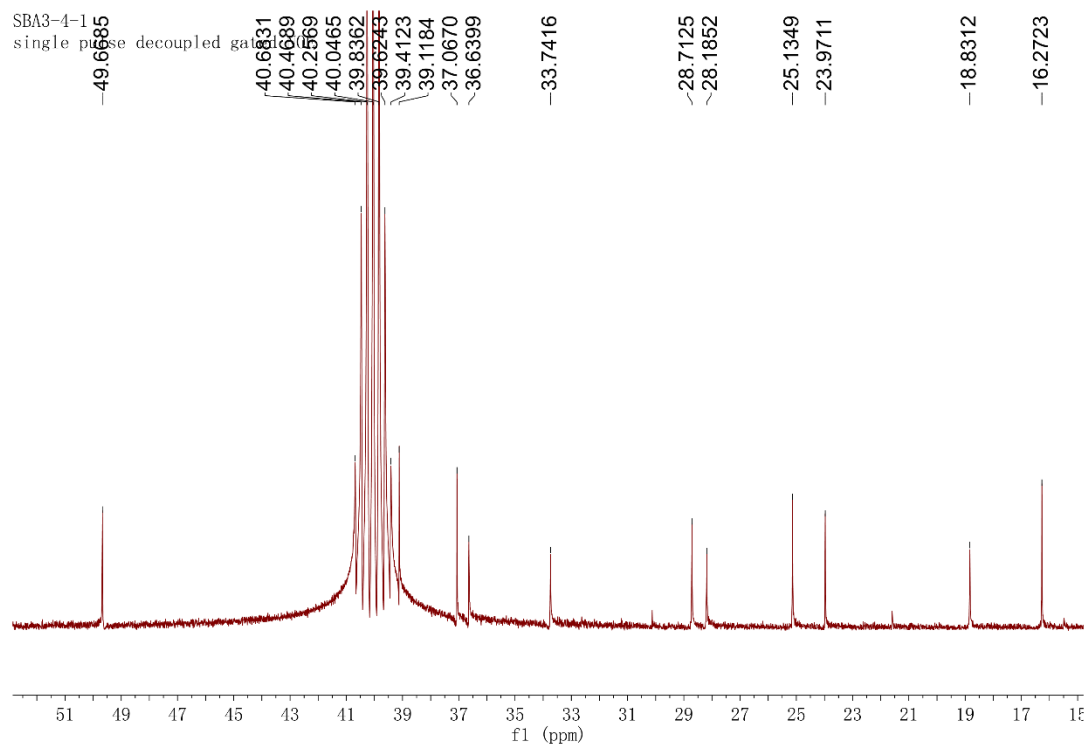

Figure S3.  $^{13}\text{C}$  NMR spectrum of 1 in  $\text{DMSO-d}_6$

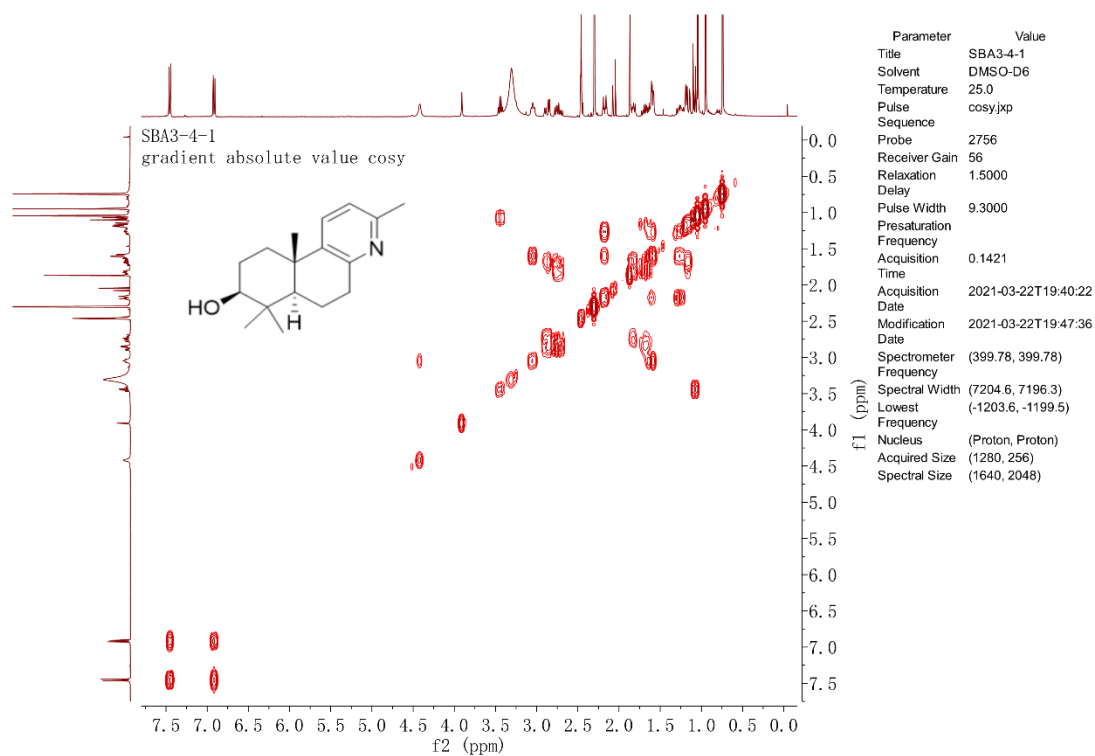

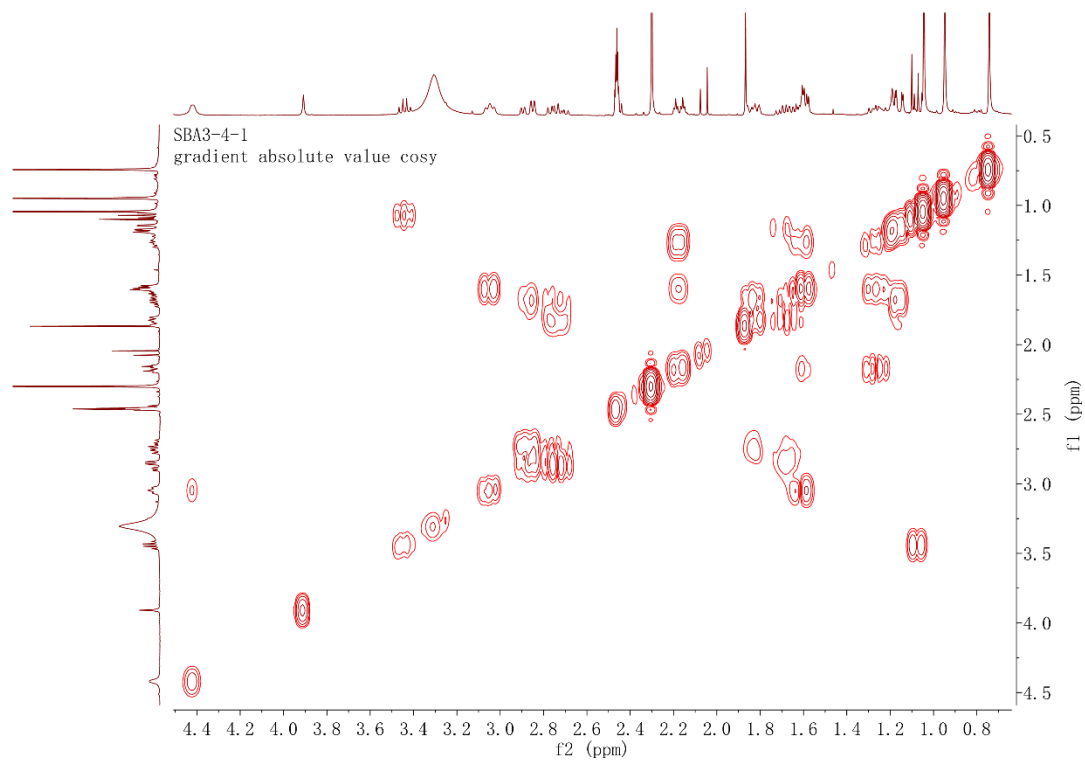

Figure S4.  $^1\text{H}$ - $^1\text{H}$  COSY spectrum of **1** in  $\text{DMSO-d}_6$

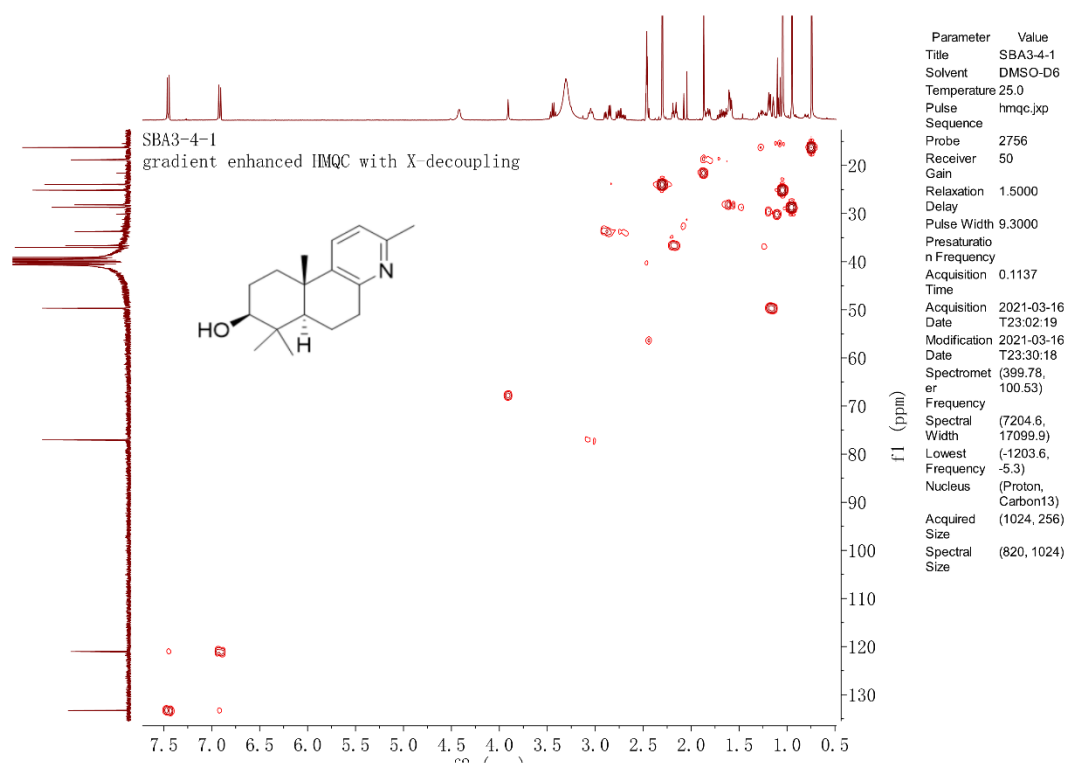



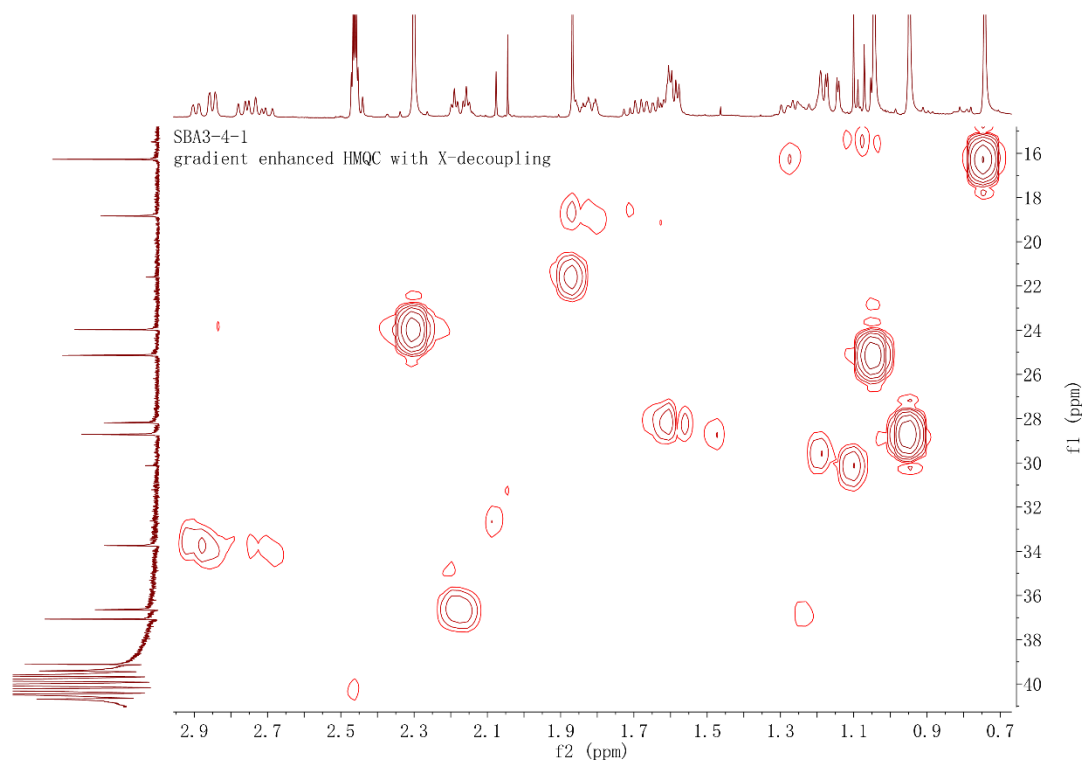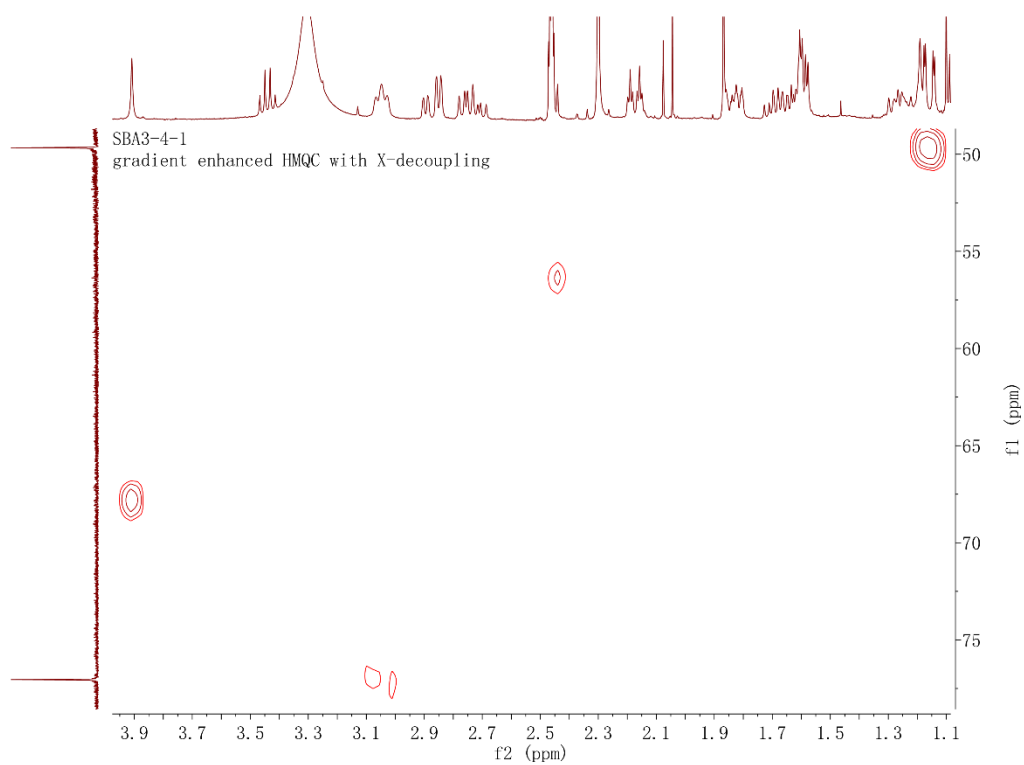

**Figure S5. HMQC spectrum of 1 in DMSO-d<sub>6</sub>**

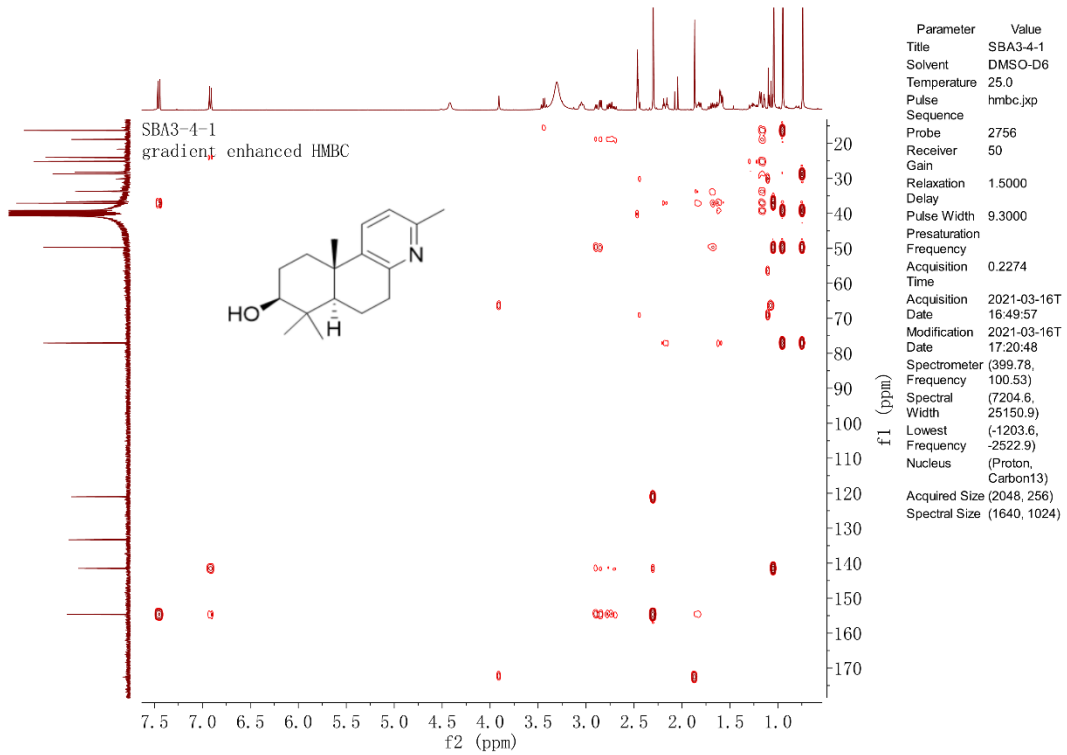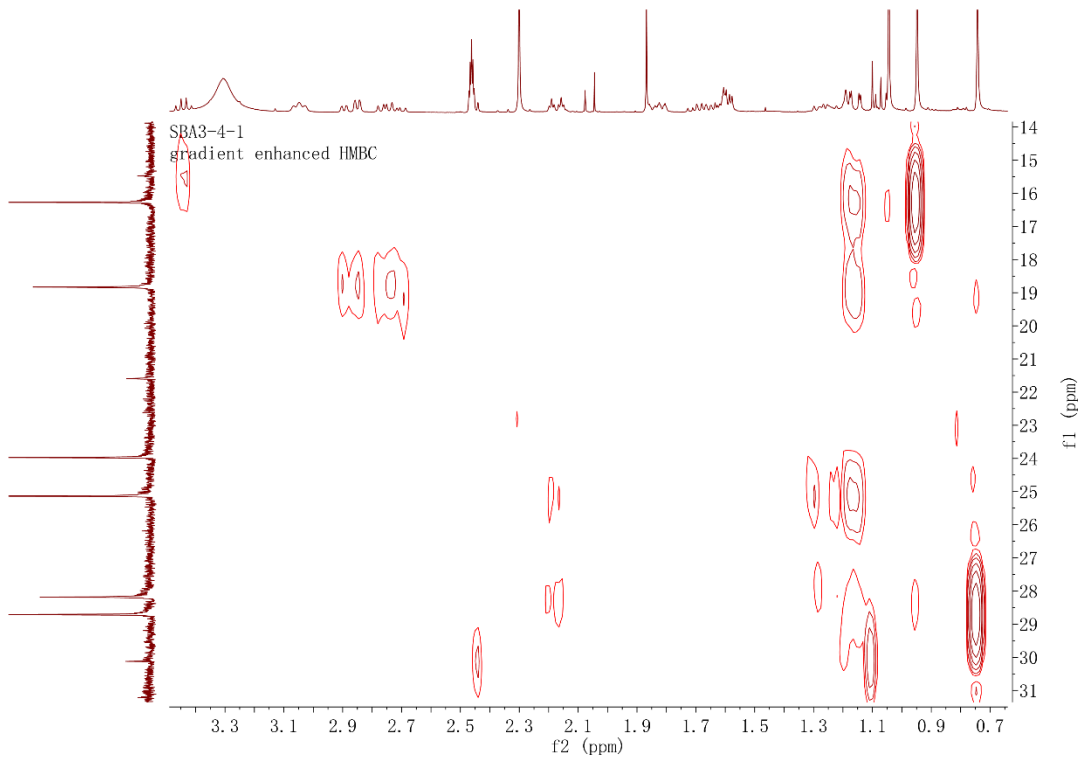

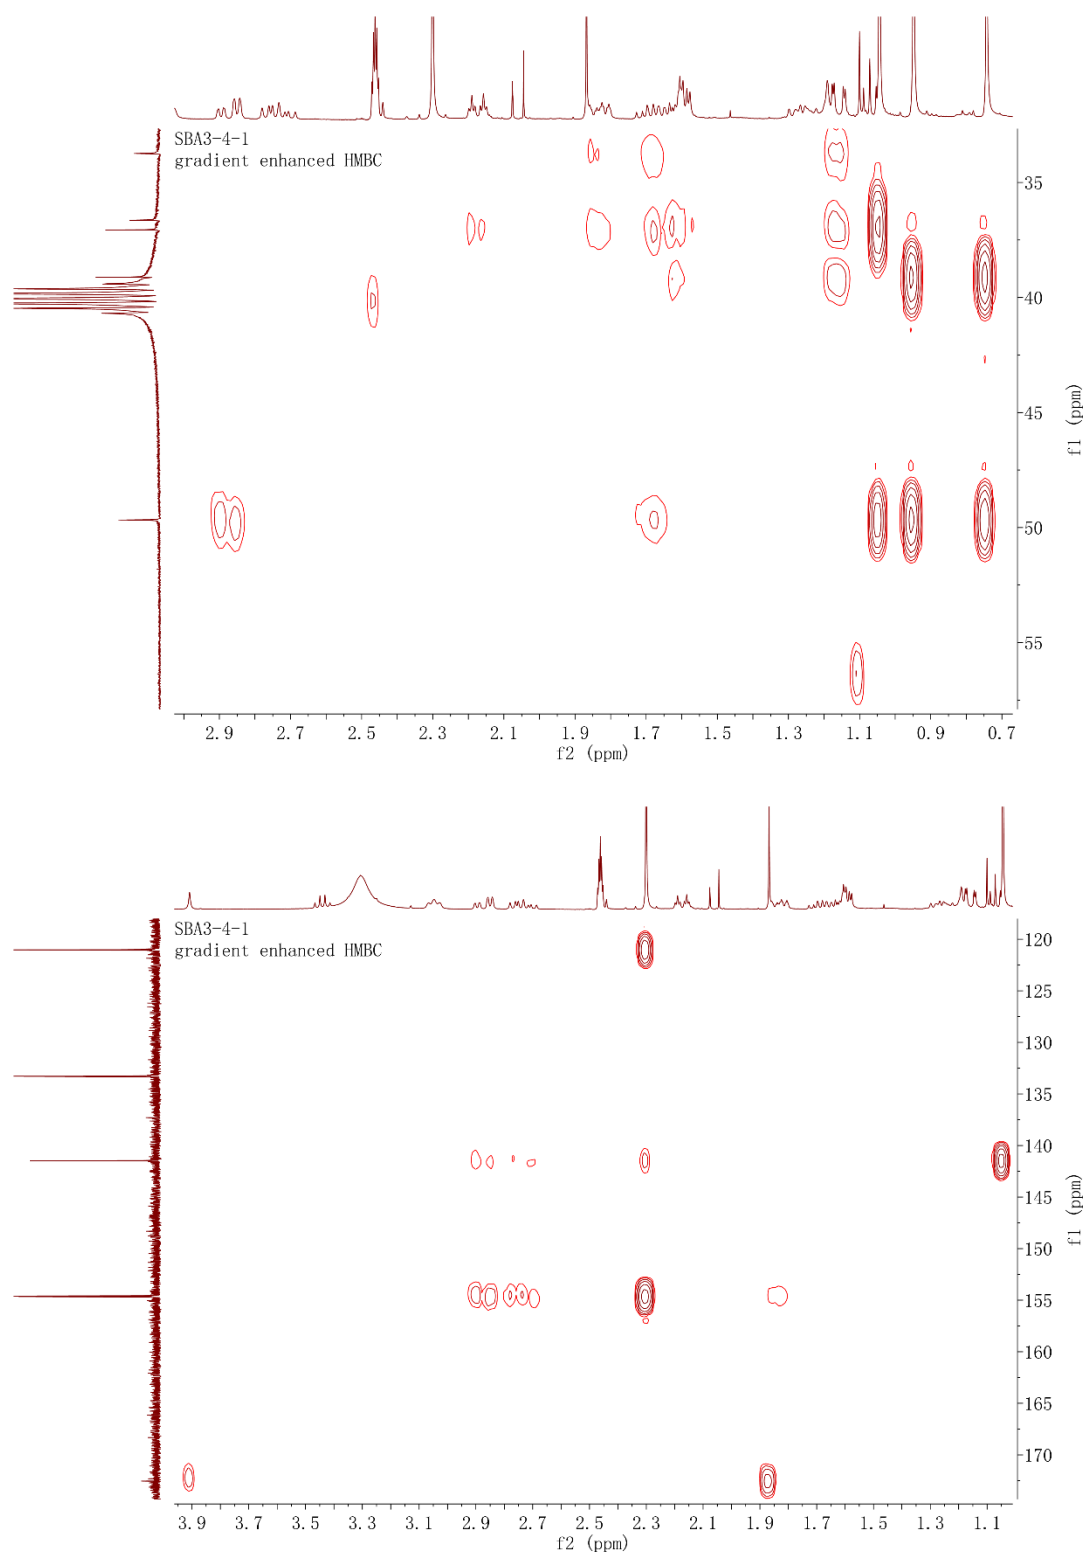

**Figure S6. HMBC spectrum of 1 in DMSO-d<sub>6</sub>**

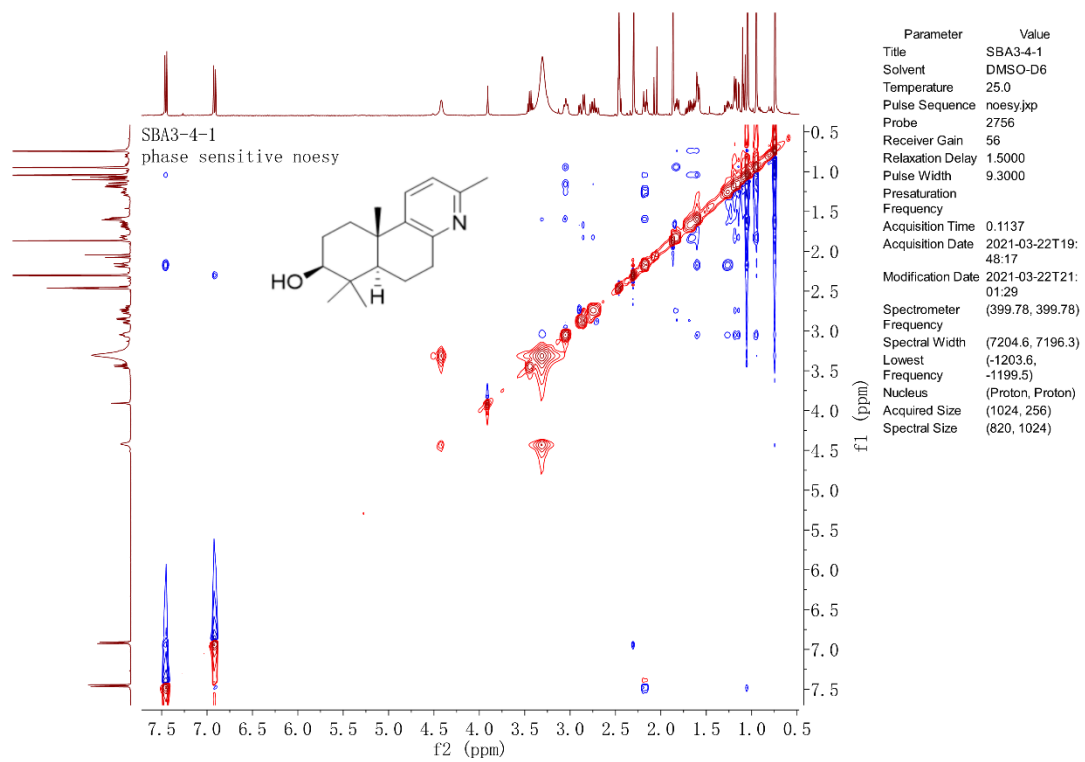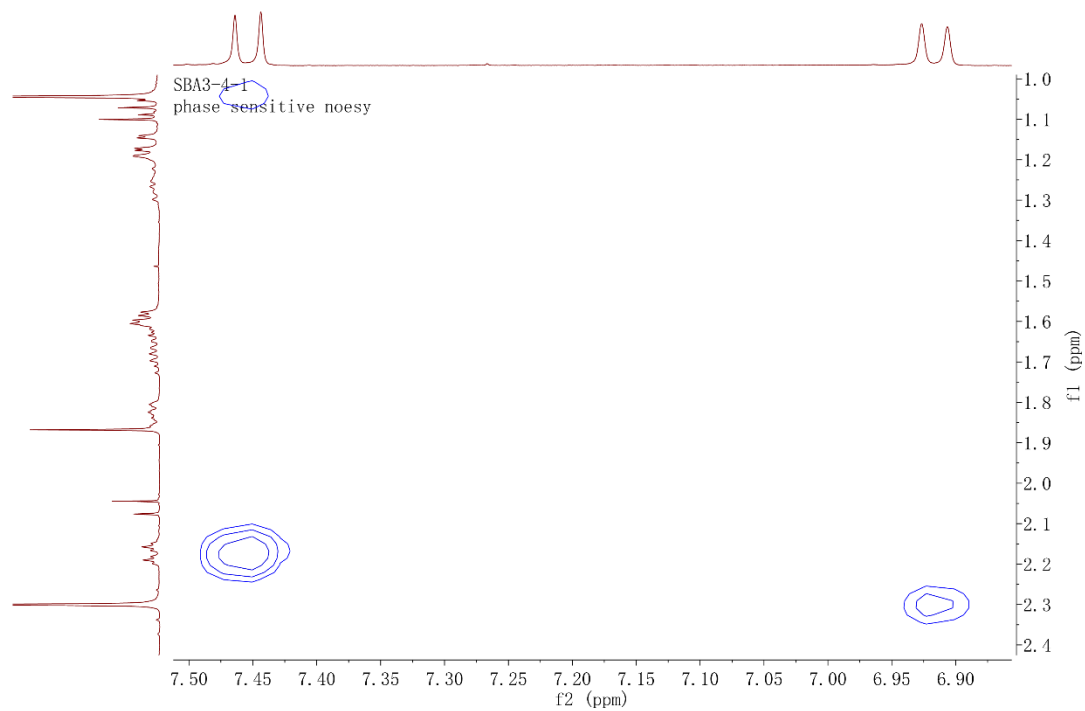

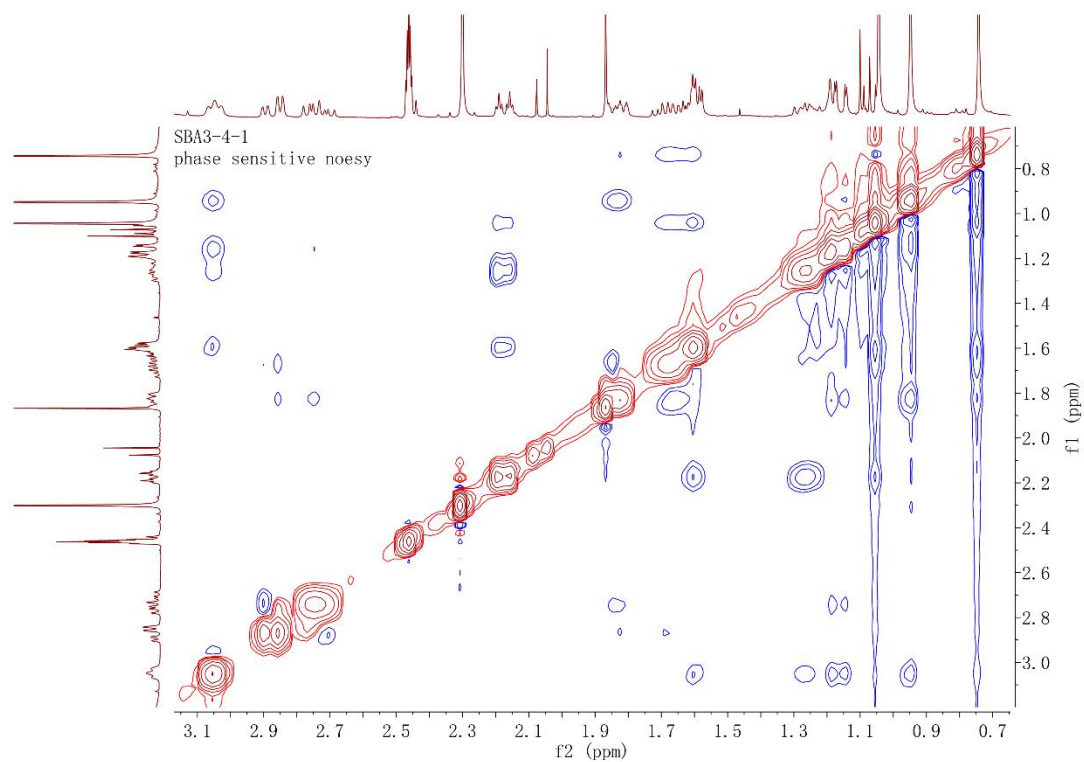

**Figure S7. NOESY spectrum of 1 in DMSO-d6**

Crystal data for yt\_dsj2:  $C_{17}H_{25}NO \cdot 2(H_2O)$ ,  $M = 295.41$ ,  $a = 9.7060(9)$  Å,  $b = 24.576(2)$  Å,  $c = 14.6471(17)$  Å,  $\alpha = 90^\circ$ ,  $\beta = 109.129(4)^\circ$ ,  $\gamma = 90^\circ$ ,  $V = 3300.9(6)$  Å<sup>3</sup>,  $T = 100.(2)$  K, space group  $P1211$ ,  $Z = 8$ ,  $\mu(\text{Cu K}\alpha) = 0.638$  mm<sup>-1</sup>, 47471 reflections measured, 12142 independent reflections ( $R_{int} = 0.1023$ ). The final  $R_I$  values were 0.1145 ( $I > 2\sigma(I)$ ). The final  $wR(F^2)$  values were 0.3024 ( $I > 2\sigma(I)$ ). The final  $R_I$  values were 0.1218 (all data). The final  $wR(F^2)$  values were 0.3132 (all data). The goodness of fit on  $F^2$  was 1.371. Flack parameter = -0.24(14).

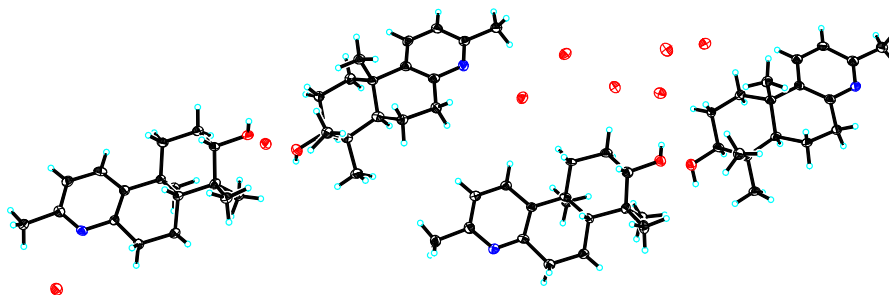

View of the molecules in an asymmetric unit.

Displacement ellipsoids are drawn at the 30% probability level.

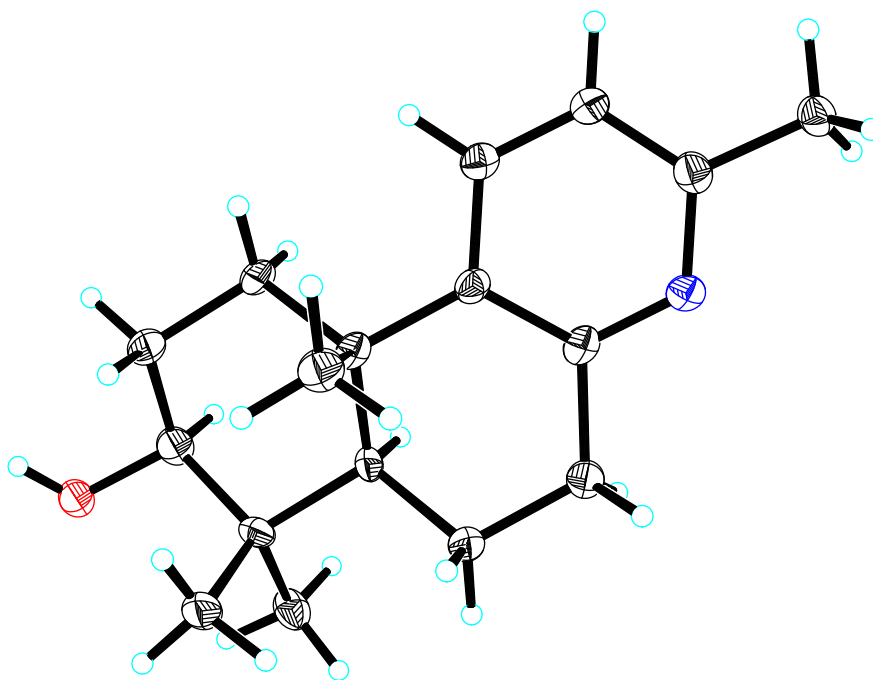

View of a molecule of yt\_dsj2 with the atom-labelling scheme.

Displacement ellipsoids are drawn at the 30% probability level.

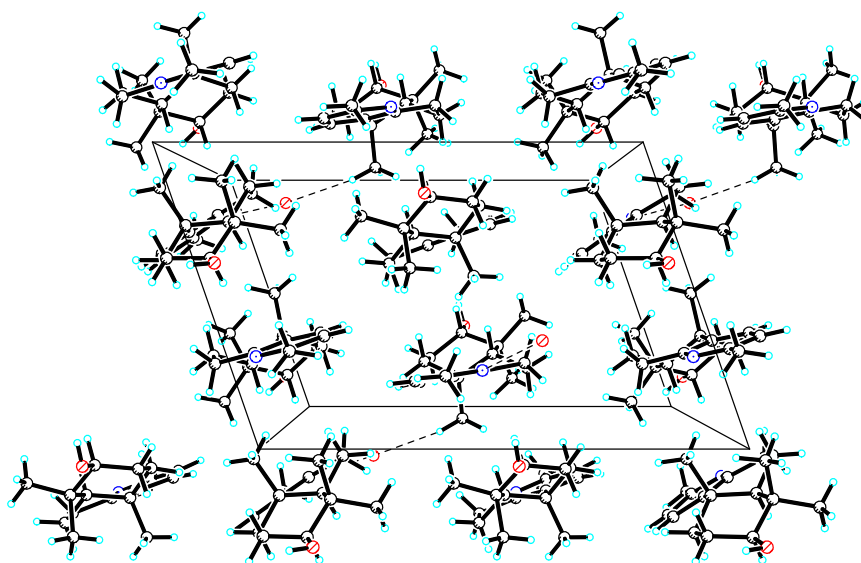

View of the pack drawing of yt\_dsj2.

Hydrogen-bonds are shown as dashed lines.

Table 1. Crystal data and structure refinement for yt\_dsj2\_0m.

|                                 |                                                  |                  |
|---------------------------------|--------------------------------------------------|------------------|
| Identification code             | global                                           |                  |
| Empirical formula               | C <sub>17</sub> H <sub>29</sub> N O <sub>3</sub> |                  |
| Formula weight                  | 295.41                                           |                  |
| Temperature                     | 100(2) K                                         |                  |
| Wavelength                      | 1.54178 Å                                        |                  |
| Crystal system                  | Monoclinic                                       |                  |
| Space group                     | P 1 21 1                                         |                  |
| Unit cell dimensions            | a = 9.7060(9) Å                                  | α = 90°.         |
|                                 | b = 24.576(2) Å                                  | β = 109.129(4)°. |
|                                 | c = 14.6471(17) Å                                | γ = 90°.         |
| Volume                          | 3300.9(6) Å <sup>3</sup>                         |                  |
| Z                               | 8                                                |                  |
| Density (calculated)            | 1.189 Mg/m <sup>3</sup>                          |                  |
| Absorption coefficient          | 0.638 mm <sup>-1</sup>                           |                  |
| F(000)                          | 1296                                             |                  |
| Crystal size                    | 0.650 x 0.110 x 0.080 mm <sup>3</sup>            |                  |
| Theta range for data collection | 3.19 to 73.50°.                                  |                  |
| Index ranges                    | -11 ≤ h ≤ 10, -30 ≤ k ≤ 30, -18 ≤ l ≤ 18         |                  |
| Reflections collected           | 47471                                            |                  |
| Independent reflections         | 12142 [R(int) = 0.1023]                          |                  |

|                                   |                                             |
|-----------------------------------|---------------------------------------------|
| Completeness to theta = 73.50°    | 98.2 %                                      |
| Absorption correction             | Semi-empirical from equivalents             |
| Max. and min. transmission        | 0.95 and 0.33                               |
| Refinement method                 | Full-matrix least-squares on F <sup>2</sup> |
| Data / restraints / parameters    | 12142 / 1 / 776                             |
| Goodness-of-fit on F <sup>2</sup> | 1.371                                       |
| Final R indices [I>2sigma(I)]     | R1 = 0.1145, wR2 = 0.3024                   |
| R indices (all data)              | R1 = 0.1218, wR2 = 0.3132                   |
| Absolute structure parameter      | -0.24(14)                                   |
| Largest diff. peak and hole       | 0.633 and -0.470 e.Å <sup>-3</sup>          |

**Figure S8. X-ray crystallographic data of 1**

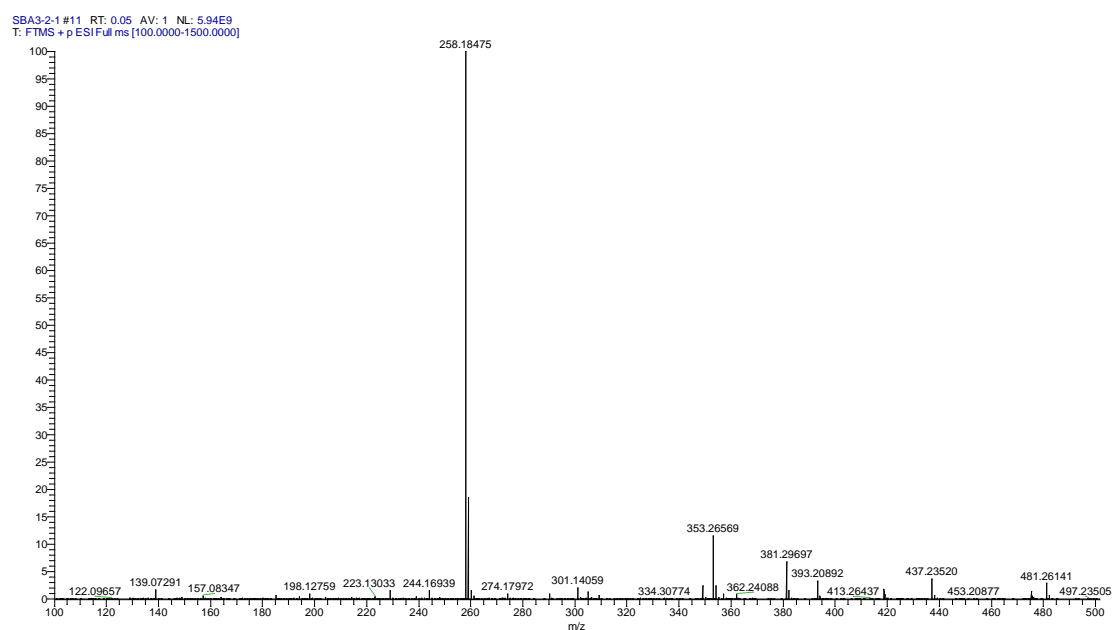

**Figure S9. HR-ESI spectrum of 2**



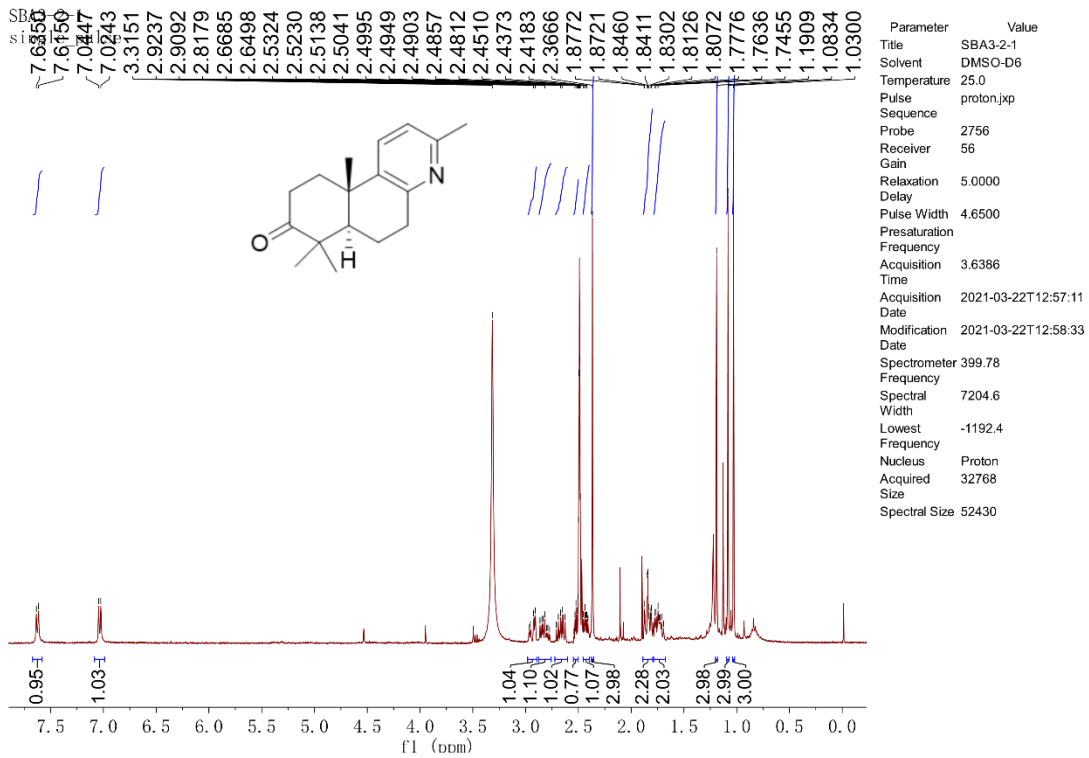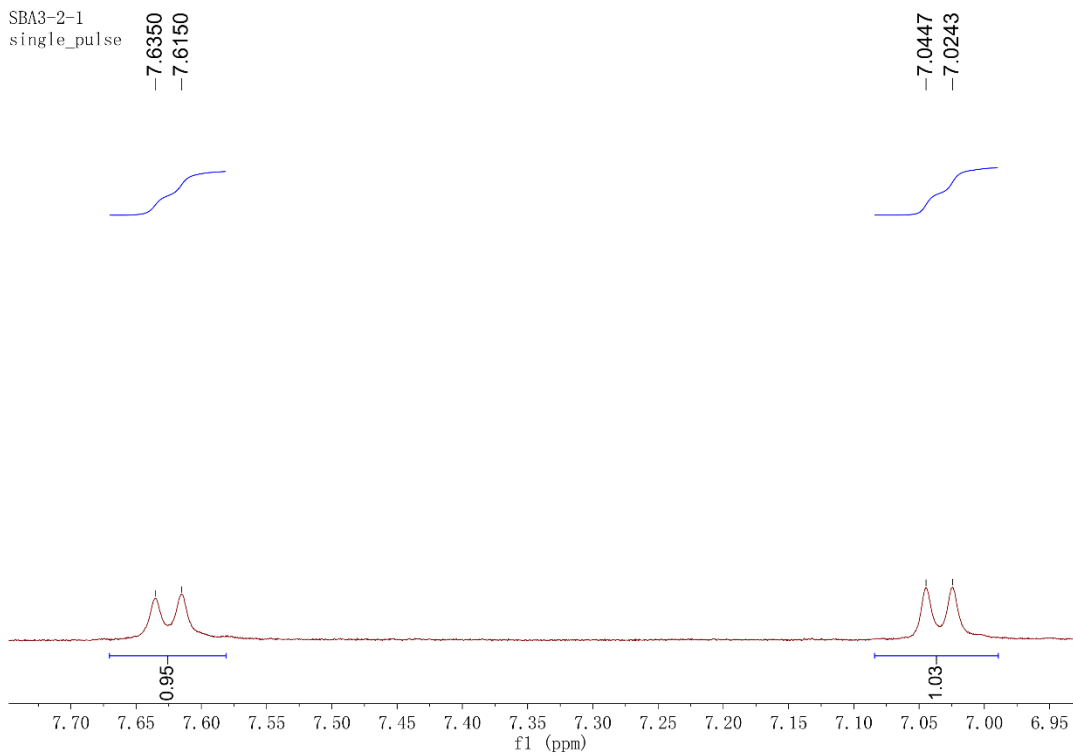

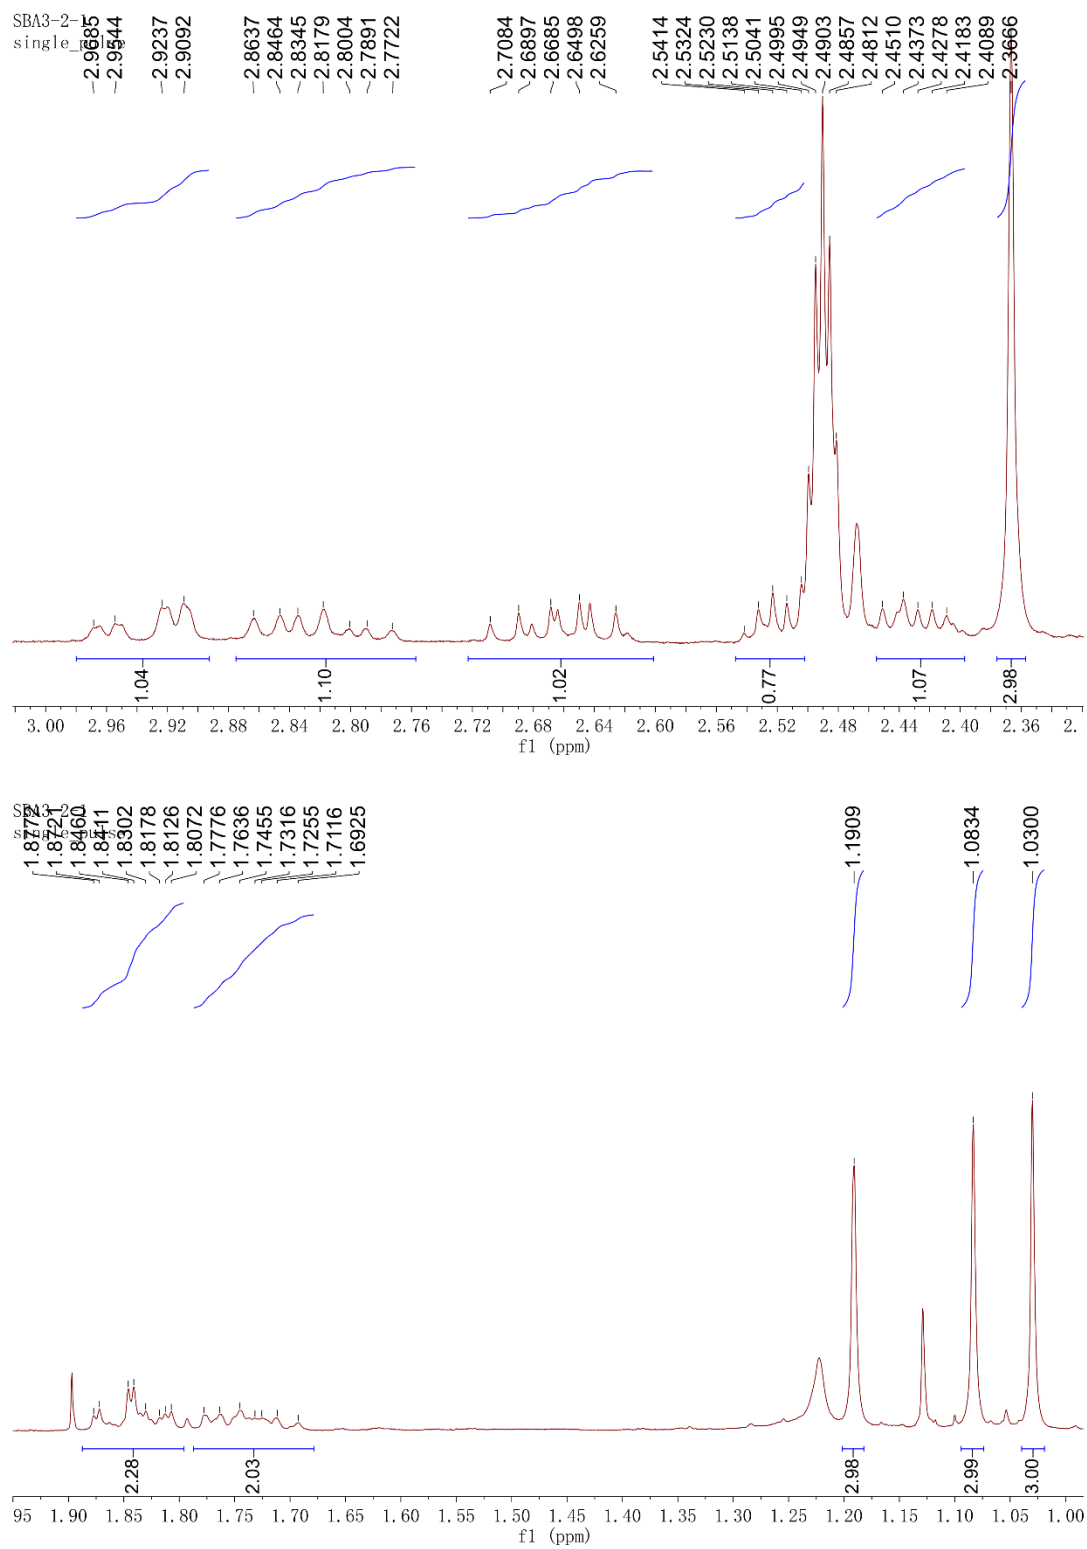

Figure S10.  $^1\text{H}$  NMR spectrum of 2 in  $\text{DMSO-d}_6$

data/1  
SBA3-2-1

154.9244  
154.0970  
147.0493  
131.5276  
121.5014

49.6791  
47.1071  
40.3019  
40.1349  
39.9678  
39.8006  
39.6338  
39.4669  
36.8089  
36.6085  
34.5550  
33.4862  
26.8113  
24.4425  
23.6940  
21.2731  
19.8128

| Parameter         | Value               |
|-------------------|---------------------|
| Title             | SBA3-2-1            |
| Solvent           | DMSO-D6             |
| Temperature       | 25.0                |
| Pulse Sequence    | carbon.jxp          |
| Probe             | 2756                |
| Receiver Gain     | 50                  |
| Relaxation Delay  | 2.0000              |
| Pulse Width       | 3.1500              |
| Presaturation     |                     |
| Frequency         |                     |
| Acquisition Time  | 1.0381              |
| Acquisition Date  | 2021-03-26T04:09:25 |
| Modification Date | 2021-03-26T08:28:56 |
| Spectrometer      | 100.53              |
| Frequency         |                     |
| Spectral Width    | 25252.5             |
| Lowest            | -2573.7             |
| Frequency         |                     |
| Nucleus           | Carbon13            |
| Acquired Size     | 32768               |
| Spectral Size     | 52430               |

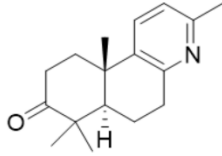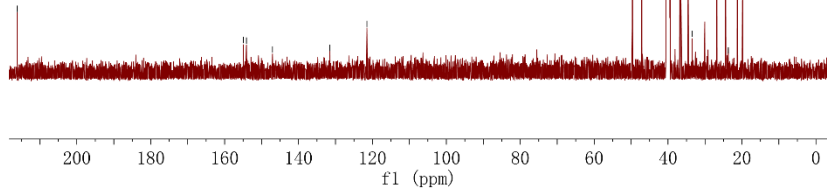

data/1  
SBA3-2-1

216.1426  
154.9244  
154.0970  
147.0493  
131.5276  
121.5014

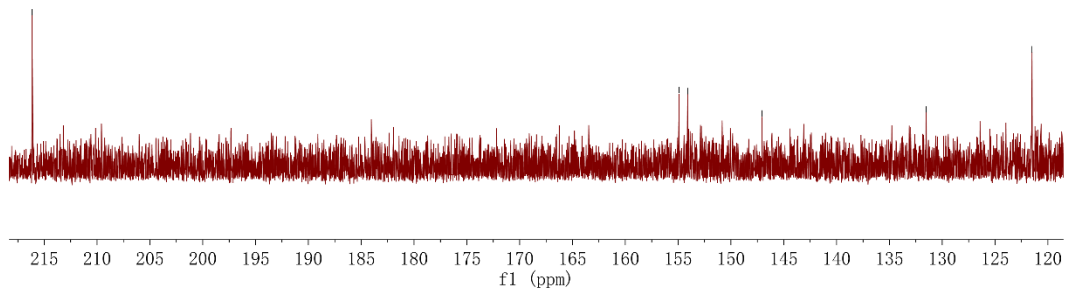

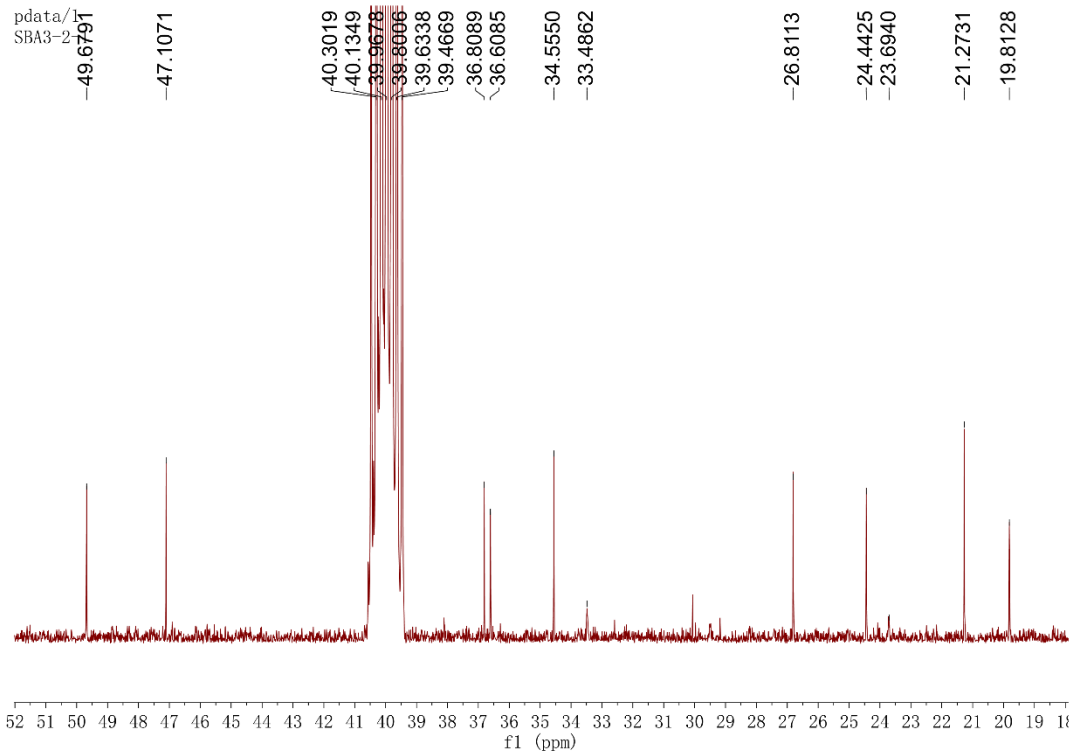

Figure S11.  $^{13}\text{C}$  NMR spectrum of 2 in  $\text{DMSO-d}_6$

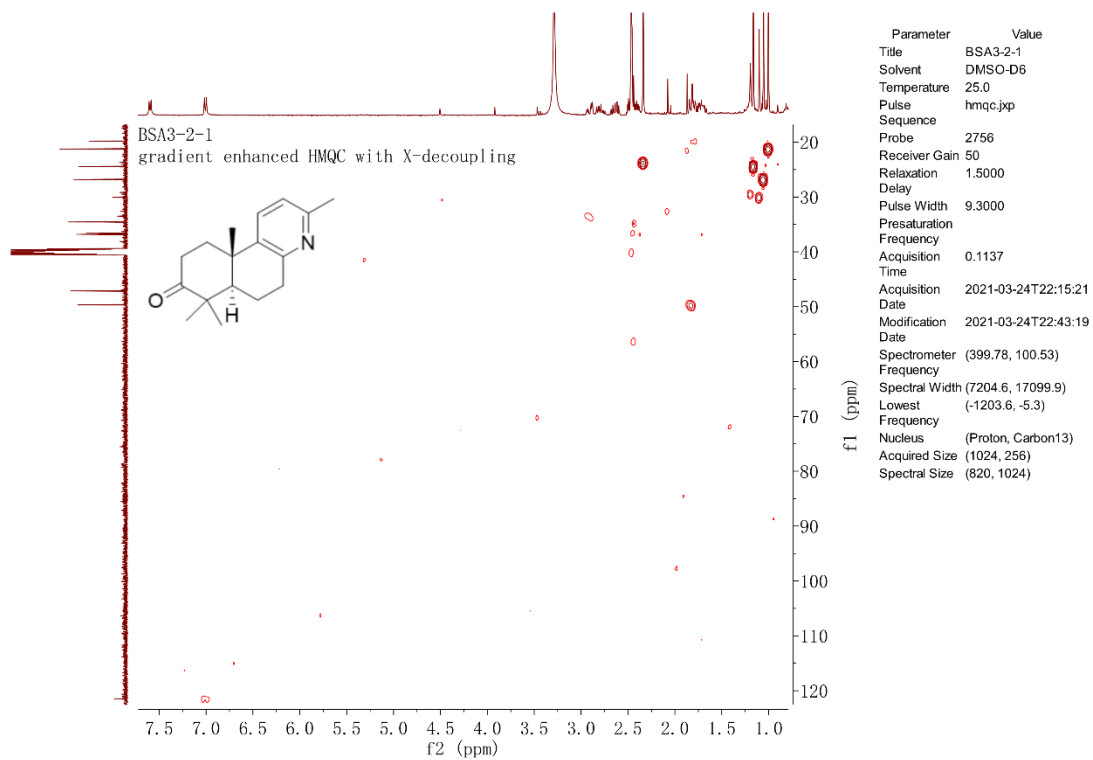

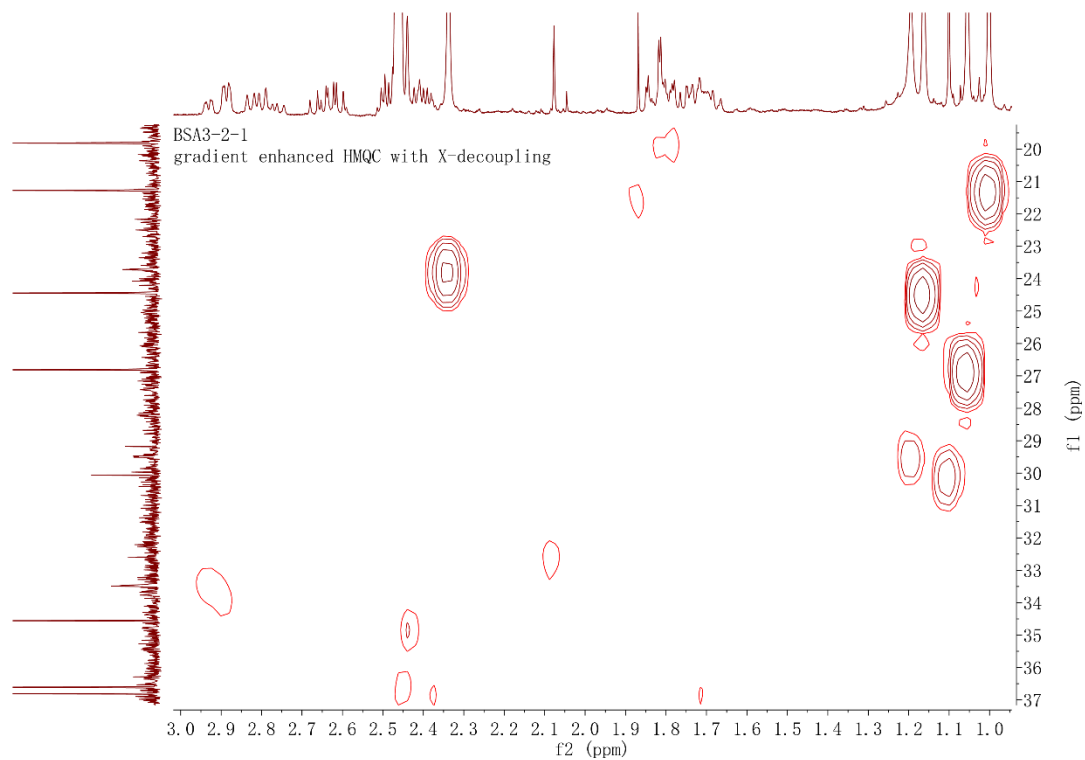

Figure S12. HMQC spectrum of 2 in DMSO-d<sub>6</sub>

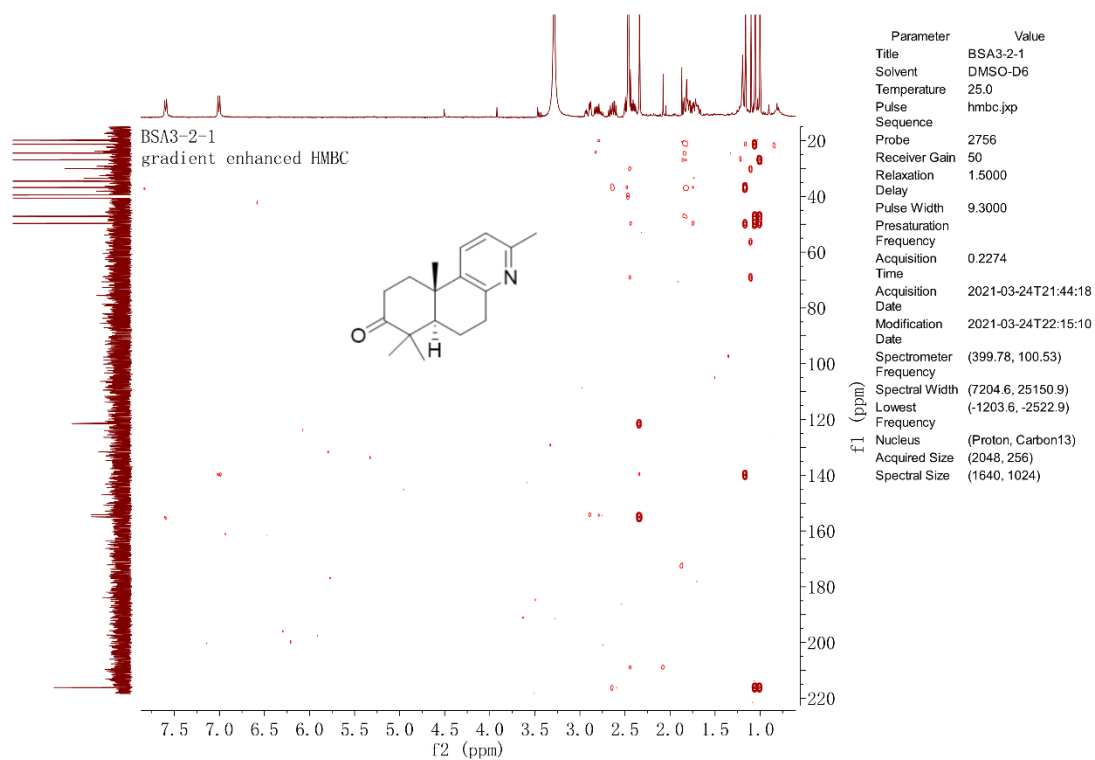

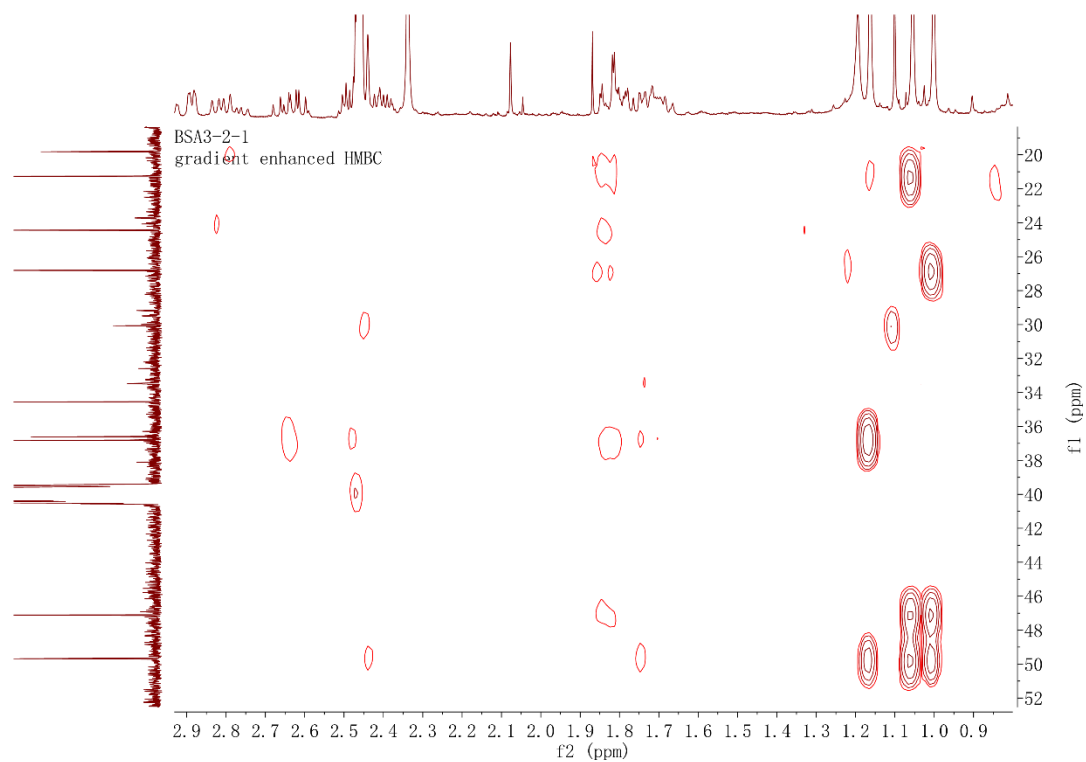

Figure S13. HMBC spectrum of 2 in DMSO-d<sub>6</sub>

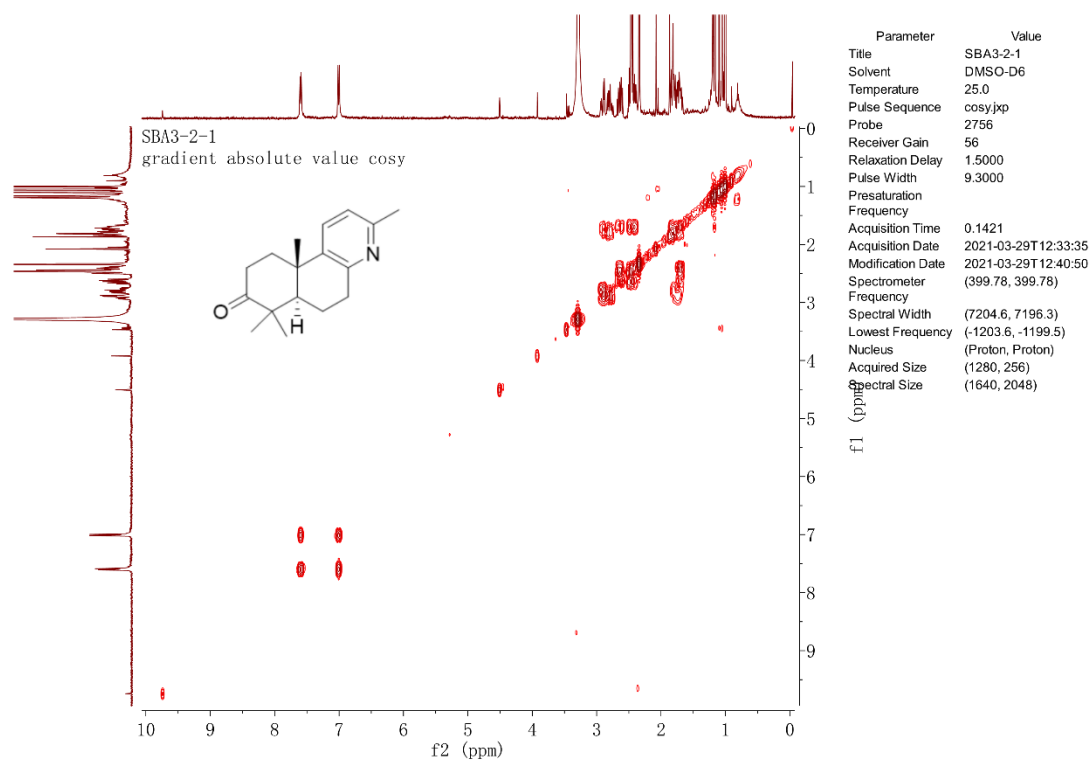

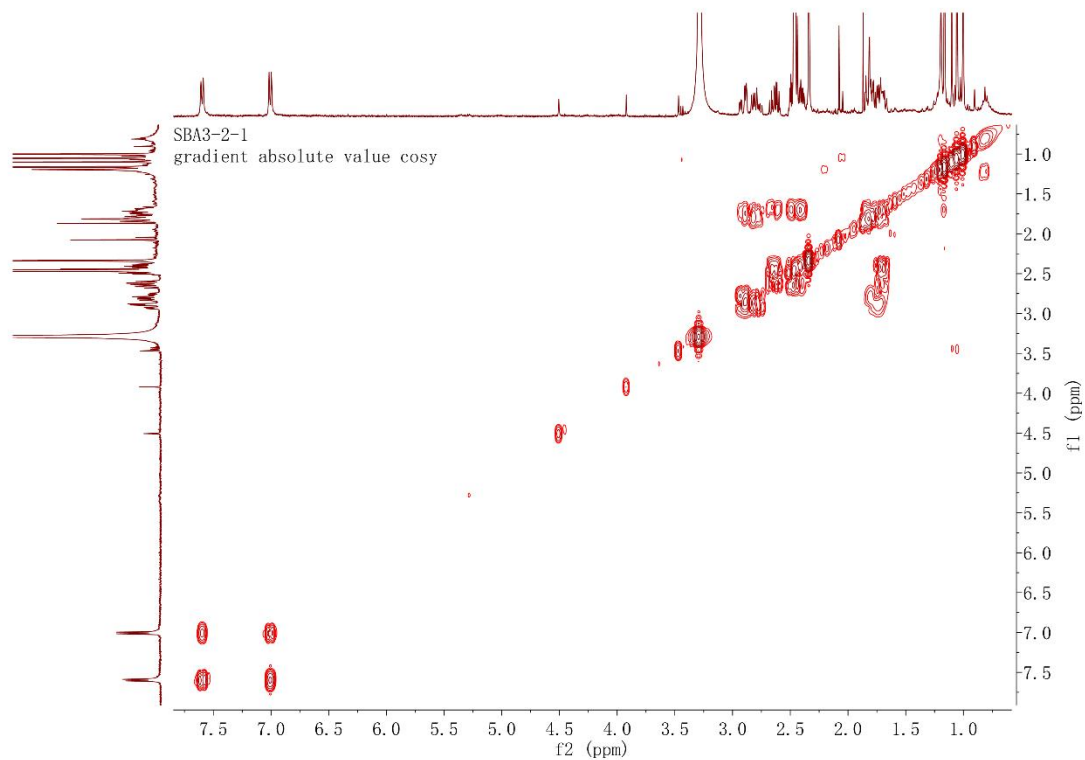

Figure S14.  $^1\text{H}$ - $^1\text{H}$  COSY spectrum of **2** in  $\text{DMSO-d}_6$

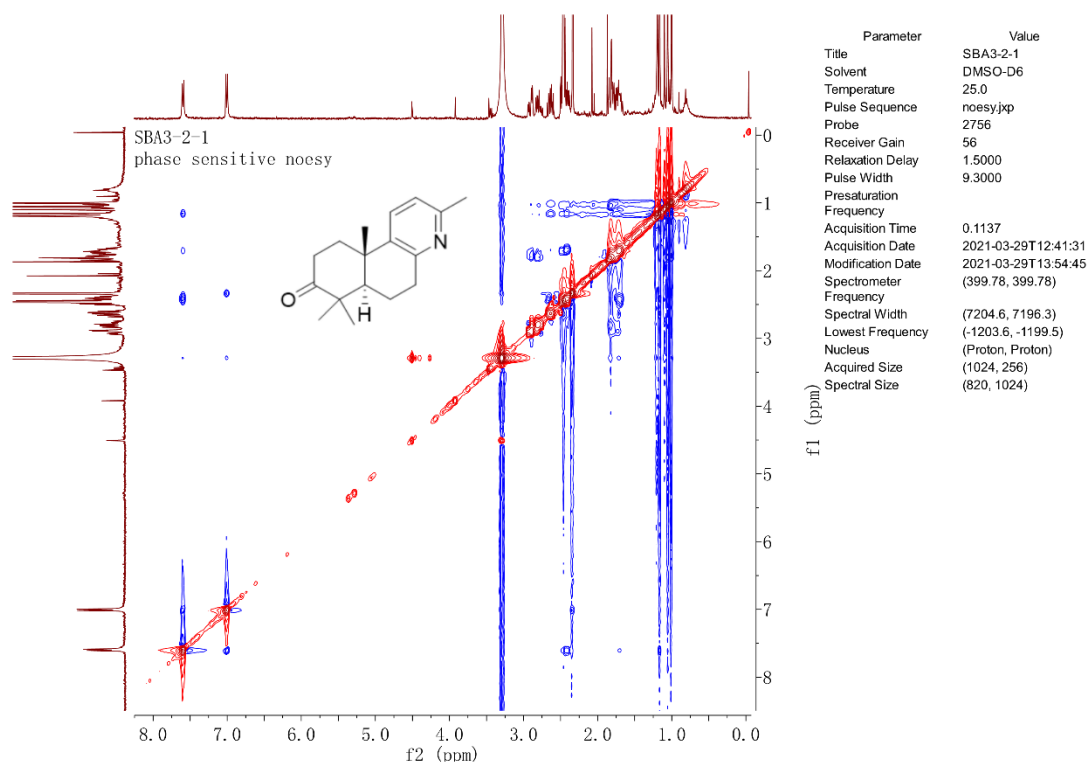

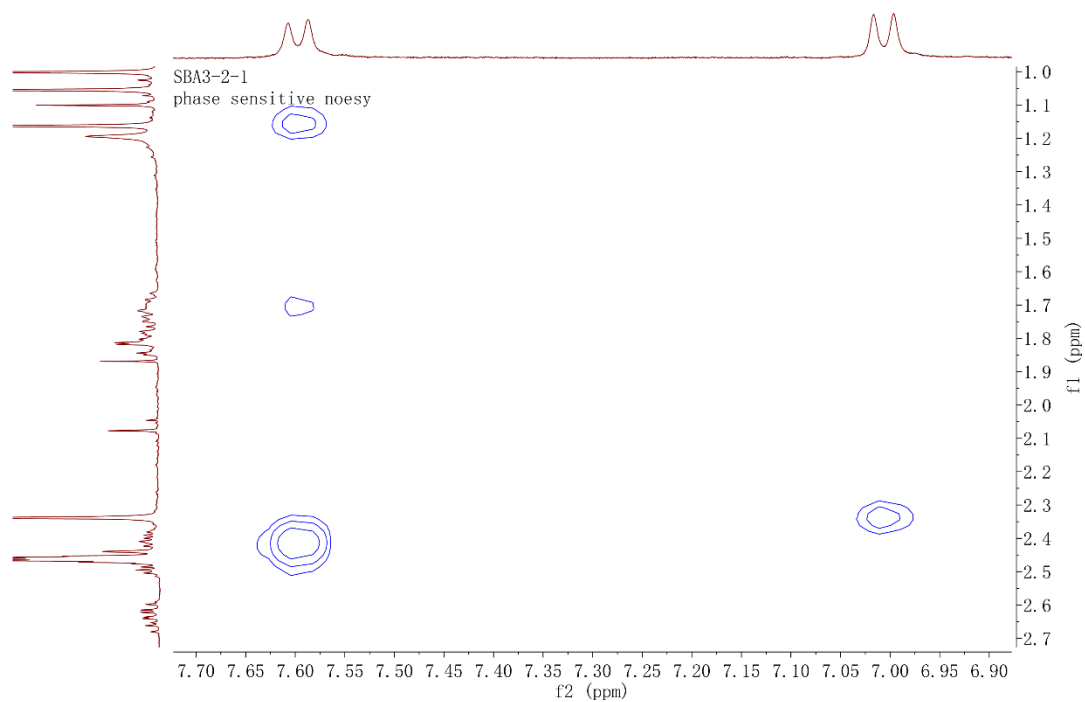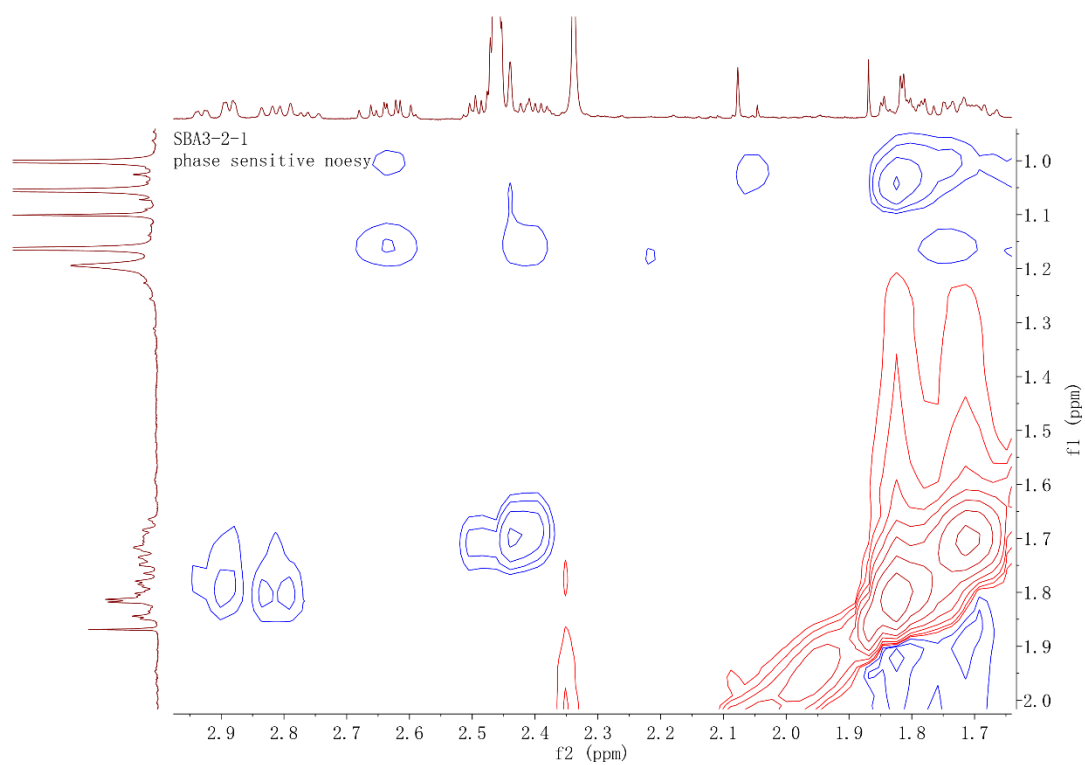

**Figure S15. NOESY spectrum of 2 in DMSO-d<sub>6</sub>**



SBA3-2-1 - RawData

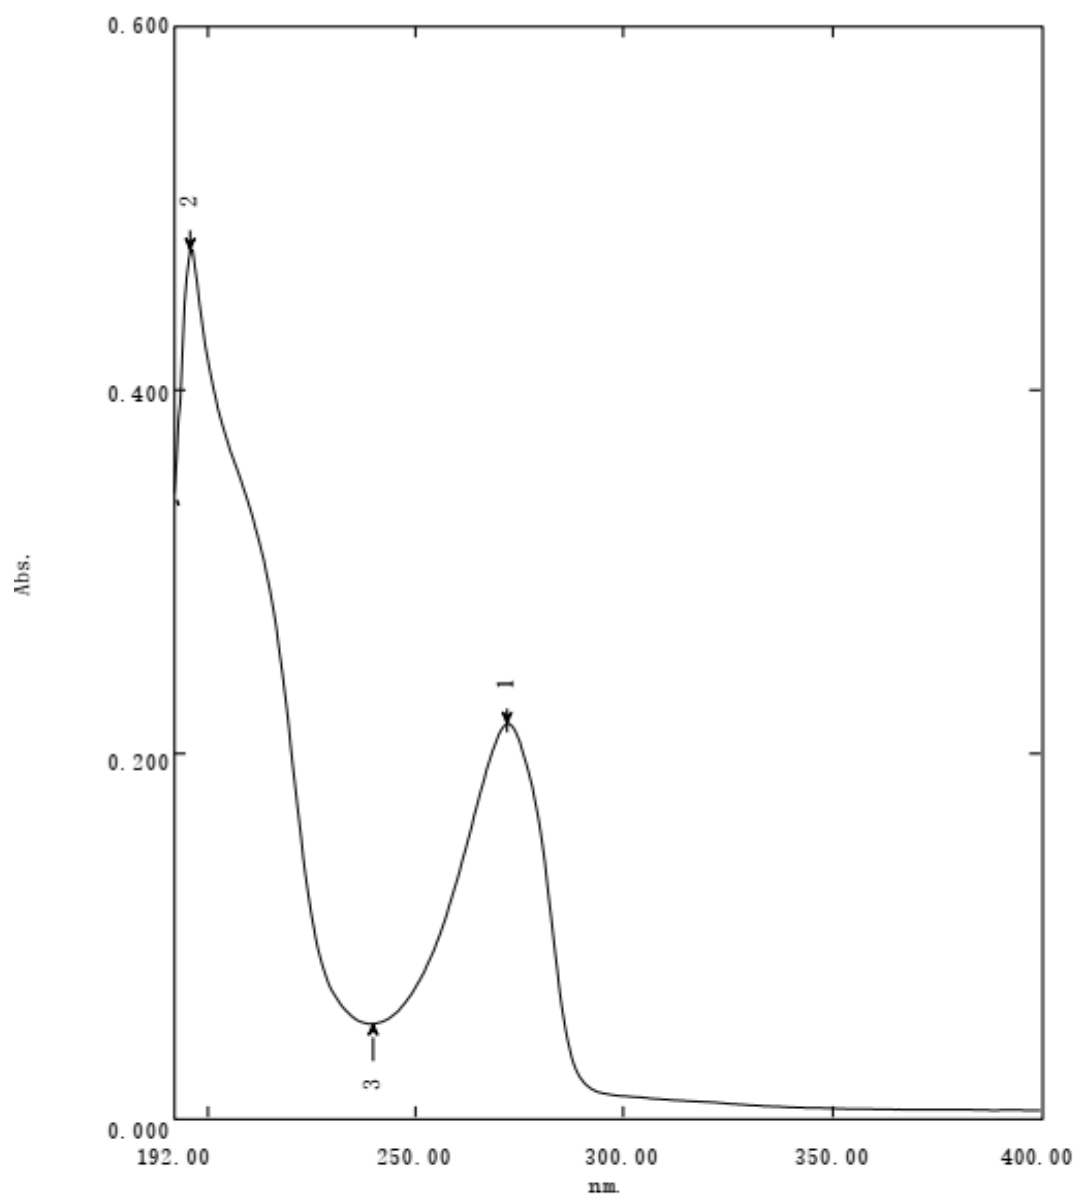

| No. | P/V | 波长 (nm) | Abs.  | 描述 |
|-----|-----|---------|-------|----|
| 1   | ↑   | 272.00  | 0.216 |    |
| 2   | ↑   | 196.00  | 0.477 |    |
| 3   | ↓   | 239.50  | 0.051 |    |
| 4   | ↓   | 192.00  | 0.343 |    |

Figure S16. UV spectrum of 2 in MeOH

### ECD results of 2

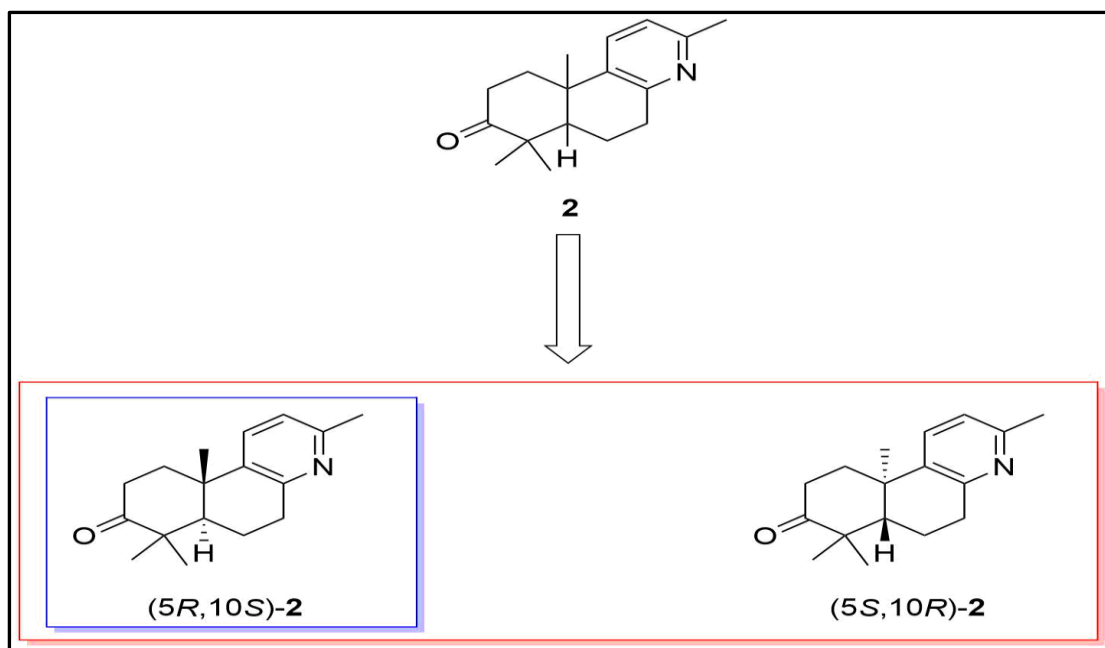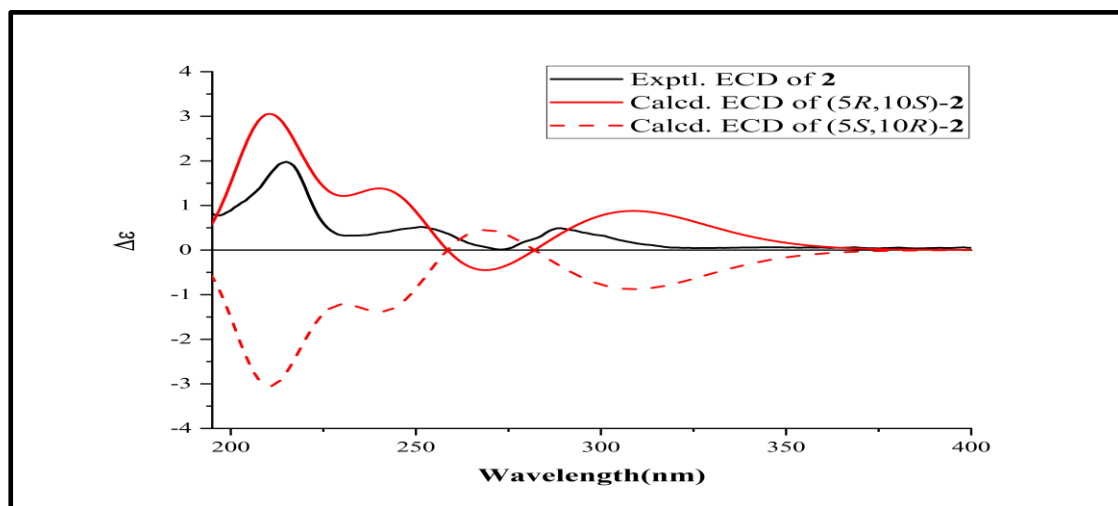

Fig.1. Experimental ECD curves of **2** (solid black line) and M062X/TZVP//B3LYP/6-31G(d) calculated ECD spectra of **(5R,10S)-2** (solid red line) and **(5R,10S)-2** (dash red line).

## 1. Conformer and energy analysis

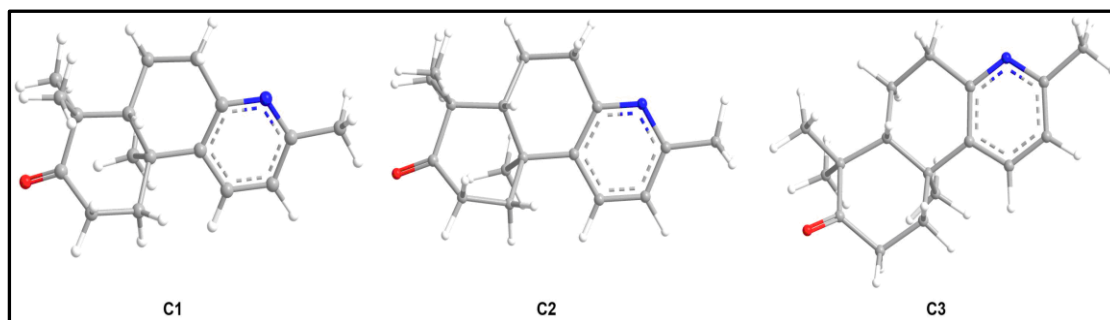

Fig. 2. B3LYP/6-31G(d) optimized lowest energy conformers for (5R,10S)-2

Table 1. Energy (298.15 K) analysis for (5R,10S)-2

| Conf. | G (Hartree) | $\Delta G$ (Kcal/mol) | Boltzmann Distribution |
|-------|-------------|-----------------------|------------------------|
| C1    | -791.748257 | 0                     | 0.372244767            |
| C2    | -791.748106 | 0.09475401            | 0.317203515            |
| C3    | -791.748086 | 0.10730421            | 0.310551718            |

## 2. ECD data

### 2.1 ECD simulation

ECD spectrum of each conformation is simulated according to the overlapping Gaussian functions expressed as:

$$\Delta\varepsilon(E) = \frac{1}{2.296 \times 10^{-39} \sqrt{\pi} \sigma} \sum_i^A \Delta E_i R_i e^{[-(E - \Delta E_i)^2 / \sigma^2]}$$

Where  $\sigma$  is half the bandwidth at 1/e peak height and expressed in energy units. The parameters  $\Delta E_i$  and  $R_i$  are the excitation energies and rotational strengths for the transition  $I$ , respectively.

The above function is converted to  $\Delta\varepsilon$ ,  $\lambda$  (wavelength) correlations as:

$$\Delta\varepsilon(\lambda) = \frac{1}{2.296 \times 10^{-39} \sqrt{\pi} \sigma} \sum_i^A \Delta E_i R_i e^{[-(1240/\lambda - \Delta E_i)^2 / \sigma^2]}$$

and then simulation were accomplished by using the Excel 2003 and the Origin 9.1 software.

### 2.2 Calculated ECD Data for (5R,10S)-2 in methanol

| State | C1                      |                     | C2                      |                     | C3                      |                     |
|-------|-------------------------|---------------------|-------------------------|---------------------|-------------------------|---------------------|
|       | Excitation energies(eV) | Rotatory Strengths* | Excitation energies(eV) | Rotatory Strengths* | Excitation energies(eV) | Rotatory Strengths* |
| 1     | 4.1507                  | 12.5699             | 4.1502                  | 12.7213             | 4.0895                  | -5.6649             |
| 2     | 4.9654                  | -10.1046            | 5.0535                  | -10.9946            | 4.966                   | -8.6865             |

|    |        |          |        |          |        |          |
|----|--------|----------|--------|----------|--------|----------|
| 3  | 5.2167 | 13.8661  | 5.2679 | 13.7566  | 5.2208 | 12.9665  |
| 4  | 5.7955 | 0.6318   | 5.7269 | 0.7583   | 5.7835 | 0.2888   |
| 5  | 6.2148 | 18.2291  | 6.1476 | 17.6158  | 6.2137 | 11.5167  |
| 6  | 6.8367 | -46.5303 | 6.8514 | -2.0703  | 6.8557 | -16.743  |
| 7  | 6.8641 | 37.3614  | 6.9229 | -47.8502 | 6.8883 | -47.3199 |
| 8  | 6.9529 | 11.8963  | 6.9969 | 49.5532  | 6.9362 | 42.5042  |
| 9  | 7.1096 | 23.0774  | 7.0696 | 33.0483  | 7.0879 | 34.7899  |
| 10 | 7.1455 | 4.6031   | 7.2271 | 1.7447   | 7.1592 | 19.7376  |
| 11 | 7.3713 | -5.5697  | 7.346  | -25.362  | 7.2681 | -0.5441  |
| 12 | 7.4405 | -5.8241  | 7.4106 | -6.2956  | 7.4132 | -11.0651 |
| 13 | 7.4754 | 16.9848  | 7.4488 | 33.6945  | 7.4722 | -10.6861 |
| 14 | 7.5926 | 5.3193   | 7.5619 | 4.0625   | 7.5474 | 10.874   |
| 15 | 7.7154 | 7.7292   | 7.6775 | 3.9771   | 7.7288 | 0.4758   |
| 16 | 7.76   | -12.1662 | 7.7236 | -9.3972  | 7.7749 | 1.9292   |
| 17 | 7.8033 | 2.9587   | 7.8004 | -0.5982  | 7.9041 | -1.3452  |
| 18 | 7.8693 | 13.7277  | 7.951  | 10.5599  | 7.9431 | 1.3306   |
| 19 | 7.9909 | 0.3687   | 7.9937 | 3.6218   | 7.9535 | 8.2621   |
| 20 | 8.109  | -16.9228 | 8.0474 | -19.7945 | 8.1347 | -27.4753 |
| 21 | 8.1348 | -11.3797 | 8.1605 | -9.0723  | 8.1369 | -17.7901 |
| 22 | 8.1612 | -30.2039 | 8.2248 | -46.9594 | 8.1614 | -3.0874  |
| 23 | 8.265  | -3.4795  | 8.2665 | -0.0335  | 8.2321 | 2.0259   |
| 24 | 8.3093 | -15.5442 | 8.3192 | -9.177   | 8.2989 | -10.9359 |
| 25 | 8.4194 | 3.1032   | 8.3783 | 14.9852  | 8.3559 | 1.2884   |
| 26 | 8.4396 | 10.4353  | 8.4518 | -5.1363  | 8.4233 | -1.3573  |
| 27 | 8.4744 | -2.9899  | 8.4905 | -0.1295  | 8.4561 | 11.3192  |
| 28 | 8.5423 | 9.5301   | 8.5457 | 26.9615  | 8.4865 | -0.0122  |
| 29 | 8.566  | -25.2745 | 8.5659 | -14.2915 | 8.5157 | 14.2841  |
| 30 | 8.5907 | 48.6112  | 8.6041 | -52.7682 | 8.6006 | -67.0943 |
| 31 | 8.6091 | -33.5327 | 8.6342 | 39.3095  | 8.6166 | 1.6128   |
| 32 | 8.6694 | -24.6767 | 8.6985 | 26.003   | 8.6438 | -30.1321 |
| 33 | 8.6949 | 38.0212  | 8.7045 | -10.8051 | 8.6722 | 53.1564  |
| 34 | 8.7211 | -81.8699 | 8.726  | -49.2211 | 8.6781 | 13.494   |
| 35 | 8.7684 | 3.1443   | 8.7649 | -4.7618  | 8.7393 | -3.7035  |
| 36 | 8.7863 | 12.2685  | 8.7764 | 20.4338  | 8.7722 | -7.3009  |
| 37 | 8.8333 | 38.8757  | 8.8277 | 62.3943  | 8.8145 | 17.2524  |
| 38 | 8.8584 | -16.717  | 8.8449 | -4.9717  | 8.8266 | 5.8313   |
| 39 | 8.8704 | 35.0945  | 8.8671 | -51.597  | 8.8497 | 36.827   |
| 40 | 8.8972 | -16.5842 | 8.8946 | 30.0902  | 8.8836 | 1.6127   |
| 41 | 8.9808 | 10.2452  | 8.9682 | -4.2296  | 8.9386 | 10.0373  |
| 42 | 8.9942 | -14.0926 | 8.9774 | 19.7253  | 8.9565 | -1.6295  |
| 43 | 9.0052 | 24.3231  | 9.0111 | -8.6635  | 9.0001 | -17.5142 |
| 44 | 9.0383 | 2.8539   | 9.0279 | 9.4965   | 9.048  | -0.8886  |
| 45 | 9.0696 | -9.0273  | 9.0448 | -7.5612  | 9.0762 | 11.4838  |

|    |        |          |        |          |        |          |
|----|--------|----------|--------|----------|--------|----------|
| 46 | 9.0792 | -8.6556  | 9.0589 | 7.6623   | 9.1172 | 21.241   |
| 47 | 9.0946 | 2.1322   | 9.1036 | -6.5861  | 9.1434 | -2.2862  |
| 48 | 9.118  | 19.2625  | 9.1469 | 4.0987   | 9.1559 | -19.1095 |
| 49 | 9.2122 | 6.1108   | 9.1792 | 2.5562   | 9.2109 | -9.5425  |
| 50 | 9.2331 | -15.1409 | 9.2086 | 12.8962  | 9.2482 | -12.016  |
| 51 | 9.2644 | -5.1269  | 9.2347 | -16.8965 | 9.2717 | -5.3903  |
| 52 | 9.2829 | -2.868   | 9.2712 | 14.1253  | 9.3006 | -8.5438  |
| 53 | 9.296  | 5.8033   | 9.3112 | 3.9362   | 9.3287 | -19.5284 |
| 54 | 9.3215 | 30.0027  | 9.323  | 14.576   | 9.3441 | -13.8939 |
| 55 | 9.392  | 0.3497   | 9.3891 | 1.3673   | 9.3554 | 5.9652   |
| 56 | 9.4123 | -26.8713 | 9.4343 | -21.1868 | 9.3965 | 6.7005   |
| 57 | 9.4251 | 9.2957   | 9.4479 | 0.5539   | 9.437  | -8.1625  |
| 58 | 9.4606 | 40.9616  | 9.4713 | 14.1462  | 9.4402 | -43.0164 |
| 59 | 9.5027 | -2.6928  | 9.482  | -18.4365 | 9.4802 | -22.9911 |
| 60 | 9.5113 | -4.0404  | 9.5007 | 18.8035  | 9.496  | -39.5267 |

\* R(velocity) 10\*\*-40 erg-esu-cm

**Figure S17. ECD data of 2**
